# Supplementary material for: Identification, characterization and expression profiles of Fusarium udum stress-responsive WRKY transcription factors in Cajanus cajan under the influence of NaCl stress and Pseudomonas fluorescens OKC
Source: PubMed Central journal article supplement (PMC6778267; doi:10.1038/s41598-019-50696-x), 2019-10-04
Supplement: 41598_2019_50696_MOESM1_ESM.pdf [file 41598_2019_50696_MOESM1_ESM.pdf]

**Identification, characterization and expression profiles of *Fusarium udum* stress-responsive WRKY transcription factors in *Cajanus cajan* under influence of NaCl stress and *Pseudomonas fluorescens* OKC**

**Gagan Kumar<sup>1</sup>, Raina Bajpai<sup>1</sup>, Ankita Sarkar<sup>1</sup>, Raj Kumar Mishra<sup>2</sup>, Vijay Kumar Gupta<sup>3</sup>, Harikesh B. Singh<sup>1</sup> and Birinchi K. Sarma<sup>1\*</sup>**

**Table S1: CcWRKYs detail according to their accession number**

| Accession no. | CcWRKY genes    | Accession no. | CcWRKY genes    | Accession no. | CcWRKY genes    | Accession no. | CcWRKY genes    |
|---------------|-----------------|---------------|-----------------|---------------|-----------------|---------------|-----------------|
| C.cajan_24537 | <i>CcWRKY1</i>  | C.cajan_26666 | <i>CcWRKY26</i> | C.cajan_05913 | <i>CcWRKY51</i> | C.cajan_26986 | <i>CcWRKY76</i> |
| C.cajan_29780 | <i>CcWRKY2</i>  | C.cajan_02335 | <i>CcWRKY27</i> | C.cajan_07333 | <i>CcWRKY52</i> | C.cajan_27136 | <i>CcWRKY77</i> |
| C.cajan_29457 | <i>CcWRKY3</i>  | C.cajan_28176 | <i>CcWRKY28</i> | C.cajan_08309 | <i>CcWRKY53</i> | C.cajan_27183 | <i>CcWRKY78</i> |
| C.cajan_13648 | <i>CcWRKY4</i>  | C.cajan_16563 | <i>CcWRKY29</i> | C.cajan_08356 | <i>CcWRKY54</i> | C.cajan_27628 | <i>CcWRKY79</i> |
| C.cajan_20775 | <i>CcWRKY5</i>  | C.cajan_25148 | <i>CcWRKY30</i> | C.cajan_08357 | <i>CcWRKY55</i> | C.cajan_27637 | <i>CcWRKY80</i> |
| C.cajan_29116 | <i>CcWRKY6</i>  | C.cajan_25149 | <i>CcWRKY31</i> | C.cajan_08458 | <i>CcWRKY56</i> | C.cajan_28168 | <i>CcWRKY81</i> |
| C.cajan_13299 | <i>CcWRKY7</i>  | C.cajan_04816 | <i>CcWRKY32</i> | C.cajan_08473 | <i>CcWRKY57</i> | C.cajan_28399 | <i>CcWRKY82</i> |
| C.cajan_13689 | <i>CcWRKY8</i>  | C.cajan_41239 | <i>CcWRKY33</i> | C.cajan_09788 | <i>CcWRKY58</i> | C.cajan_29119 | <i>CcWRKY83</i> |
| C.cajan_23649 | <i>CcWRKY9</i>  | C.cajan_05144 | <i>CcWRKY34</i> | C.cajan_10884 | <i>CcWRKY59</i> | C.cajan_30708 | <i>CcWRKY84</i> |
| C.cajan_00060 | <i>CcWRKY10</i> | C.cajan_05149 | <i>CcWRKY35</i> | C.cajan_11749 | <i>CcWRKY60</i> | C.cajan_32192 | <i>CcWRKY85</i> |
| C.cajan_26275 | <i>CcWRKY11</i> | C.cajan_04448 | <i>CcWRKY36</i> | C.cajan_13633 | <i>CcWRKY61</i> | C.cajan_32591 | <i>CcWRKY86</i> |
| C.cajan_08231 | <i>CcWRKY12</i> | C.cajan_16799 | <i>CcWRKY37</i> | C.cajan_14327 | <i>CcWRKY62</i> | C.cajan_32672 | <i>CcWRKY87</i> |
| C.cajan_41159 | <i>CcWRKY13</i> | C.cajan_27330 | <i>CcWRKY38</i> | C.cajan_14927 | <i>CcWRKY63</i> | C.cajan_35643 | <i>CcWRKY88</i> |
| C.cajan_03812 | <i>CcWRKY14</i> | C.cajan_35299 | <i>CcWRKY39</i> | C.cajan_15948 | <i>CcWRKY64</i> | C.cajan_37436 | <i>CcWRKY89</i> |
| C.cajan_10680 | <i>CcWRKY15</i> | C.cajan_17992 | <i>CcWRKY40</i> | C.cajan_18219 | <i>CcWRKY65</i> | C.cajan_39263 | <i>CcWRKY90</i> |
| C.cajan_18758 | <i>CcWRKY16</i> | C.cajan_04900 | <i>CcWRKY41</i> | C.cajan_20299 | <i>CcWRKY66</i> | C.cajan_39557 | <i>CcWRKY91</i> |
| C.cajan_05407 | <i>CcWRKY17</i> | C.cajan_05822 | <i>CcWRKY42</i> | C.cajan_20860 | <i>CcWRKY67</i> | C.cajan_40968 | <i>CcWRKY92</i> |
| C.cajan_19828 | <i>CcWRKY18</i> | C.cajan_42797 | <i>CcWRKY43</i> | C.cajan_23223 | <i>CcWRKY68</i> | C.cajan_47800 | <i>CcWRKY93</i> |
| C.cajan_28195 | <i>CcWRKY19</i> | C.cajan_00971 | <i>CcWRKY44</i> | C.cajan_23650 | <i>CcWRKY69</i> | C.cajan_43040 | <i>CcWRKY94</i> |
| C.cajan_29944 | <i>CcWRKY20</i> | C.cajan_01682 | <i>CcWRKY45</i> | C.cajan_23812 | <i>CcWRKY70</i> | C.cajan_44344 | <i>CcWRKY95</i> |
| C.cajan_36768 | <i>CcWRKY21</i> | C.cajan_02255 | <i>CcWRKY46</i> | C.cajan_25091 | <i>CcWRKY71</i> | C.cajan_44345 | <i>CcWRKY96</i> |
| C.cajan_41592 | <i>CcWRKY22</i> | C.cajan_03945 | <i>CcWRKY47</i> | C.cajan_25490 | <i>CcWRKY72</i> | C.cajan_48561 | <i>CcWRKY97</i> |
| C.cajan_08305 | <i>CcWRKY23</i> | C.cajan_04594 | <i>CcWRKY48</i> | C.cajan_25681 | <i>CcWRKY73</i> |               |                 |
| C.cajan_40644 | <i>CcWRKY24</i> | C.cajan_05139 | <i>CcWRKY49</i> | C.cajan_26080 | <i>CcWRKY74</i> |               |                 |
| C.cajan_43923 | <i>CcWRKY25</i> | C.cajan_05401 | <i>CcWRKY50</i> | C.cajan_26985 | <i>CcWRKY75</i> |               |                 |

**Table S2: In silico functional analysis of CcWRKYs**

| PTFDB ID      | PRJNA (NCBI) | Accession no.  | Best match in <i>Arabidopsis thaliana</i> (TAIR) | Accession no. | Function (TAIR)                                                                                                                                                                                                                                                                                                                                                                           |
|---------------|--------------|----------------|--------------------------------------------------|---------------|-------------------------------------------------------------------------------------------------------------------------------------------------------------------------------------------------------------------------------------------------------------------------------------------------------------------------------------------------------------------------------------------|
| C.cajan_00060 | CcWRKY40     | KYP53896.1     | ATWRKY40                                         | AT1G80840.1   | defense response to bacterium, defense response to fungus, negative regulation of transcription, DNA-templated, regulation of defense response, regulation of defense response to virus by host, regulation of transcription, DNA-templated, response to chitin, response to molecule of bacterial origin, response to salicylic acid, response to wounding, transcription, DNA-templated |
| C.cajan_00971 | CcWRKY39     | KYP54799.1     | ATWRKY39                                         | AT3G04670.1   | regulation of transcription, DNA-templated, transcription, DNA-templated                                                                                                                                                                                                                                                                                                                  |
| C.cajan_01682 | CcWRKY61     | XP_020225151.1 | ATWRKY61                                         | AT1G18860.1   | regulation of transcription, DNA-templated, transcription, DNA-templated                                                                                                                                                                                                                                                                                                                  |
| C.cajan_02255 | CcWRKY46     | XP_020224984.1 | ATWRKY46                                         | AT2G46400.1   | lateral root development, regulation of transcription, DNA-templated, response to chitin, transcription, DNA-templated                                                                                                                                                                                                                                                                    |
| C.cajan_02335 | CcWRKY23     | XP_020226824.1 | ATWRKY23                                         | AT2G47260.1   | regulation of transcription, DNA-templated, response to auxin, response to nematode, transcription, DNA-templated                                                                                                                                                                                                                                                                         |
| C.cajan_03812 | CcWRKY42     | KYP57628.1     | ATWRKY42                                         | AT4G04450.1   | negative regulation of transcription, DNA-templated, regulation of transcription, DNA-templated, transcription, DNA-templated                                                                                                                                                                                                                                                             |
| C.cajan_03945 | CcWRKY42     | KYP57761.1     | ATWRKY42                                         | AT4G04450.1   | negative regulation of transcription, DNA-templated, regulation of transcription, DNA-templated, transcription, DNA-templated                                                                                                                                                                                                                                                             |
| C.cajan_04448 | CcWRKY6      | KYP57761.1     | ATWRKY6                                          | AT1G62300.1   | cellular response to boron-containing substance deprivation, cellular response to phosphate starvation, ethylene-activated signaling pathway, negative regulation of transcription, DNA-templated, regulation of transcription, DNA-templated, response to chitin, transcription, DNA-templated.                                                                                          |
| C.cajan_04594 | CcWRKY41     | KYP72128.1     | ATWRKY41                                         | AT4G11070.1   | regulation of transcription, DNA-templated, transcription, DNA-templated                                                                                                                                                                                                                                                                                                                  |
| C.cajan_04816 | CcWRKY11     | XP_020239587.1 | ATWRKY11                                         | AT4G31550.1   | defense response to bacterium, regulation of transcription, DNA-templated, response to chitin, transcription, DNA-templated                                                                                                                                                                                                                                                               |
| C.cajan_04900 | CcWRKY3      | KYP72432.1     | ATWRKY3                                          | AT2G03340.1   | regulation of transcription, DNA-templated, transcription,                                                                                                                                                                                                                                                                                                                                |

|               |          |                |          |             |                                                                                                                                                                                                                                                                                                                                                                                                                                                                                              |
|---------------|----------|----------------|----------|-------------|----------------------------------------------------------------------------------------------------------------------------------------------------------------------------------------------------------------------------------------------------------------------------------------------------------------------------------------------------------------------------------------------------------------------------------------------------------------------------------------------|
|               |          |                |          |             | DNA-templated                                                                                                                                                                                                                                                                                                                                                                                                                                                                                |
| C.cajan_05139 | CcWRKY70 | KYP72670.1     | ATWRKY70 | AT3G56400.1 | defense response to bacterium, defense response to fungus, induced systemic resistance, jasmonic acid mediated signaling pathway, negative regulation of leaf senescence, negative regulation of transcription, DNA-templated, regulation of defense response, regulation of transcription, DNA-templated, response to chitin, response to jasmonic acid, response to salicylic acid, systemic acquired resistance, salicylic acid mediated signaling pathway, transcription, DNA-templated  |
| C.cajan_05144 | CcWRKY70 | KYP72675.1     | ATWRKY70 | AT3G56400.1 | defense response to bacterium, defense response to fungus, induced systemic resistance, jasmonic acid mediated signaling pathway, negative regulation of leaf senescence, negative regulation of transcription, DNA-templated, regulation of defense response, regulation of transcription, DNA-templated, response to chitin, response to jasmonic acid, response to salicylic acid, systemic acquired resistance, salicylic acid mediated signaling pathway, transcription, DNA-templated  |
| C.cajan_05149 | CcWRKY70 | KYP72680.1     | ATWRKY70 | AT3G56400.1 | defense response to bacterium, defense response to fungus, induced systemic resistance, jasmonic acid mediated signaling pathway, negative regulation of leaf senescence, negative regulation of transcription, DNA-templated, regulation of defense response, regulation of transcription, DNA-templated, response to chitin, response to jasmonic acid, response to salicylic acid, systemic acquired resistance, salicylic acid mediated signaling pathway, transcription, DNA-templated. |
| C.cajan_05401 | CcWRKY34 | KYP72930.1     | ATWRKY34 | AT4G26440.1 | pollen development, pollen germination, regulation of transcription, DNA-templated, response to cold, transcription, DNA-templated                                                                                                                                                                                                                                                                                                                                                           |
| C.cajan_05407 | CcWRKY24 | XP_020226257.1 | ATWRKY33 | AT2G38470.1 | camalexin biosynthetic process, cellular heat acclimation, cellular response to heat, defense response to bacterium, defense response to fungus, positive regulation of autophagy, regulation of transcription, DNA-templated, response to chitin, response to cold, response to heat, response to osmotic stress, response to salt stress, response to water deprivation, transcription, DNA-templated                                                                                      |
| C.cajan_05822 | CcWRKY71 | XP_020204261.1 | ATWRKY28 | AT4G18170.1 | regulation of transcription, DNA-templated, transcription, DNA-templated                                                                                                                                                                                                                                                                                                                                                                                                                     |

|               |          |                |          |             |                                                                                                                                                                                                                                                                                                         |
|---------------|----------|----------------|----------|-------------|---------------------------------------------------------------------------------------------------------------------------------------------------------------------------------------------------------------------------------------------------------------------------------------------------------|
| C.cajan_05913 | CcWRKY6  | KYP73437.1     | ATWRKY6  | AT1G62300.1 | cellular response to boron-containing substance deprivation, cellular response to phosphate starvation, ethylene-activated signaling pathway, negative regulation of transcription, DNA-templated, regulation of transcription, DNA-templated, response to chitin, transcription, DNA-templated         |
| C.cajan_07333 | CcWRKY27 | XP_020210484.1 | ATWRKY27 | AT5G52830.1 | defense response to bacterium, negative regulation of transcription, DNA-templated, nitric oxide mediated signal transduction, regulation of transcription, DNA-templated, response to gibberellin, transcription, DNA-templated                                                                        |
| C.cajan_08231 | CcWRKY72 | KYP69288.1     | ATWRKY72 | AT5G15130.1 | defense response, regulation of transcription, DNA-templated, transcription, DNA-templated                                                                                                                                                                                                              |
| C.cajan_08305 | CcWRKY51 | KYP69362.1     | ATWRKY51 | AT5G64810.1 | defense response to bacterium, defense response to fungus, jasmonic acid mediated signaling pathway, regulation of transcription, DNA-templated, transcription, DNA-templated                                                                                                                           |
| C.cajan_08309 | CcWRKY13 | XP_020213068.1 | ATWRKY13 | AT4G39410.1 | positive regulation of sclerenchyma cell differentiation, positive regulation of transcription, DNA-templated, regulation of lignin biosynthetic process, regulation of transcription, DNA-templated, transcription, DNA-templated                                                                      |
| C.cajan_08356 | CcWRKY13 | KYP69413.1     | ATWRKY13 | AT4G39410.1 | positive regulation of sclerenchyma cell differentiation, positive regulation of transcription, DNA-templated, regulation of lignin biosynthetic process, regulation of transcription, DNA-templated, transcription, DNA-templated                                                                      |
| C.cajan_08357 | CcWRKY13 | KYP69413.1     | ATWRKY13 | AT4G39410.1 | positive regulation of sclerenchyma cell differentiation, positive regulation of transcription, DNA-templated, regulation of lignin biosynthetic process, regulation of transcription, DNA-templated, transcription, DNA-templated                                                                      |
| C.cajan_08458 | CcWRKY75 | KYP69515.1     | ATWRKY75 | AT5G13080.1 | atrachoblast differentiation, lateral root development, negative regulation of transcription by RNA polymerase II, regulation of DNA-templated transcription in response to stress, regulation of response to nutrient levels, regulation of transcription, DNA-templated, transcription, DNA-templated |
| C.cajan_08473 | CcWRKY75 | KYP69530.1     | ATWRKY75 | AT5G13080.1 | atrachoblast differentiation, lateral root development, negative regulation of transcription by RNA polymerase II, regulation of DNA-templated transcription in response to stress, regulation of response to nutrient levels,                                                                          |

|               |          |                |          |             |                                                                                                                                                                                                                                                            |
|---------------|----------|----------------|----------|-------------|------------------------------------------------------------------------------------------------------------------------------------------------------------------------------------------------------------------------------------------------------------|
|               |          |                |          |             | regulation of transcription, DNA-templated, transcription, DNA-templated                                                                                                                                                                                   |
| C.cajan_09788 | CcWRKY44 | XP_020212254.1 | ATWRKY44 | AT2G37260.1 | epidermal cell fate specification, regulation of transcription, DNA-templated, seed coat development, transcription, DNA-templated                                                                                                                         |
| C.cajan_10680 | CcWRKY42 | KYP71720.1     | ATWRKY42 | AT4G04450.1 | negative regulation of transcription, DNA-templated, regulation of transcription, DNA-templated, transcription, DNA-templated                                                                                                                              |
| C.cajan_10884 | CcWRKY30 | XP_020211127.1 | ATWRKY41 | AT4G11070.1 | regulation of transcription, DNA-templated, transcription, DNA-templated                                                                                                                                                                                   |
| C.cajan_11749 | CcWRKY72 | KYP65836.1     | ATWRKY72 | AT5G15130.1 | defense response, regulation of transcription, DNA-templated, transcription, DNA-templated                                                                                                                                                                 |
| C.cajan_13299 | CcWRKY41 | XP_020217757.1 | ATWRKY41 | AT4G11070.1 | regulation of transcription, DNA-templated, transcription, DNA-templated                                                                                                                                                                                   |
| C.cajan_13633 | CcWRKY53 | XP_020223272.1 | ATWRKY41 | AT4G11070.1 | regulation of transcription, DNA-templated, transcription, DNA-templated                                                                                                                                                                                   |
| C.cajan_13648 | CcWRKY29 | KYP58649.1     | ATWRKY29 | AT4G23550.1 | defense response, regulation of transcription, DNA-templated, response to chitin, transcription, DNA-templated                                                                                                                                             |
| C.cajan_13689 | CcWRKY41 | XP_020223510.1 | ATWRKY41 | AT4G11070.1 | regulation of transcription, DNA-templated, transcription, DNA-templated                                                                                                                                                                                   |
| C.cajan_14327 | CcWRKY11 | XP_020223656.1 | ATWRKY11 | AT4G31550.1 | defense response to bacterium, regulation of transcription, DNA-templated, response to chitin, transcription, DNA-templated                                                                                                                                |
| C.cajan_14927 | CcWRKY2  | KYP59917.1     | ATWRKY2  | AT5G56270.1 | establishment of cell polarity, longitudinal axis specification, pollen development, regulation of transcription, DNA-templated, transcription, DNA-templated                                                                                              |
| C.cajan_15948 | CcWRKY27 | KYP61901.1     | ATWRKY27 | AT5G52830.1 | defense response to bacterium, negative regulation of transcription, DNA-templated, nitric oxide mediated signal transduction, regulation of transcription, DNA-templated, response to gibberellin, transcription, DNA-templated                           |
| C.cajan_16563 | CcWRKY48 | KYP62511.1     | ATWRKY48 | AT5G49520.1 | defense response to bacterium, positive regulation of transcription, DNA-templated, regulation of transcription, DNA-templated, response to bacterium, response to chitin, transcription, DNA-templated                                                    |
| C.cajan_16799 | CcWRKY6  | KYP62746.1     | ATWRKY6  | AT1G62300.1 | cellular response to boron-containing substance deprivation, cellular response to phosphate starvation, ethylene-activated signaling pathway, negative regulation of transcription, DNA-templated, regulation of transcription, DNA-templated, response to |

|               |          |                |          |             |                                                                                                                                                                                                                                                                                                                                                                                                                                                                                             |
|---------------|----------|----------------|----------|-------------|---------------------------------------------------------------------------------------------------------------------------------------------------------------------------------------------------------------------------------------------------------------------------------------------------------------------------------------------------------------------------------------------------------------------------------------------------------------------------------------------|
|               |          |                |          |             | chitin, transcription, DNA-templated.                                                                                                                                                                                                                                                                                                                                                                                                                                                       |
| C.cajan_17992 | CcWRKY4  | KYP63936.1     | ATWRKY4  | AT1G13960.2 | defense response, negative regulation of defense response to bacterium, regulation of defense response to fungus, regulation of transcription, DNA-templated, response to ethylene, response to jasmonic acid, response to salicylic acid, transcription, DNA-templated                                                                                                                                                                                                                     |
| C.cajan_18219 | CcWRKY2  | KYP64163.1     | ATWRKY2  | AT5G56270.1 | establishment of cell polarity, longitudinal axis specification, pollen development, regulation of transcription, DNA-templated, transcription, DNA-templated                                                                                                                                                                                                                                                                                                                               |
| C.cajan_18758 | CcWRKY3  | KYP64700.1     | ATWRKY4  | AT1G13960   | defense response, negative regulation of defense response to bacterium, regulation of defense response to fungus, regulation of transcription, DNA-templated, response to ethylene, response to jasmonic acid, response to salicylic acid, transcription, DNA-templated                                                                                                                                                                                                                     |
| C.cajan_19828 | CcWRKY24 | XP_020212386.1 | ATWRKY33 | AT2G38470.1 | camalexin biosynthetic process, cellular heat acclimation, cellular response to heat, defense response to bacterium, defense response to fungus, positive regulation of autophagy, regulation of transcription, DNA-templated, response to chitin, response to cold, response to heat, response to osmotic stress, response to salt stress, response to water deprivation, transcription, DNA-templated                                                                                     |
| C.cajan_20299 | CcWRKY70 | XP_020218541.1 | ATWRKY70 | AT3G56400.1 | defense response to bacterium, defense response to fungus, induced systemic resistance, jasmonic acid mediated signaling pathway, negative regulation of leaf senescence, negative regulation of transcription, DNA-templated, regulation of defense response, regulation of transcription, DNA-templated, response to chitin, response to jasmonic acid, response to salicylic acid, systemic acquired resistance, salicylic acid mediated signaling pathway, transcription, DNA-templated |
| C.cajan_20775 | CcWRKY22 | XP_020220494.1 | ATWRKY22 | AT4G01250.1 | defense response, leaf senescence, regulation of transcription, DNA-templated, response to chitin, transcription, DNA-templated                                                                                                                                                                                                                                                                                                                                                             |
| C.cajan_20860 | CcWRKY43 | XP_020219778.1 | ATWRKY56 | AT1G64000.1 | regulation of transcription, DNA-templated, transcription, DNA-templated                                                                                                                                                                                                                                                                                                                                                                                                                    |
| C.cajan_23223 | CcWRKY13 | XP_020215926.1 | ATWRKY13 | AT4G39410.1 | positive regulation of sclerenchyma cell differentiation, positive regulation of transcription, DNA-templated, regulation of lignin biosynthetic process, regulation of transcription, DNA-templated, transcription, DNA-                                                                                                                                                                                                                                                                   |

|               |          |                |          |             |                                                                                                                                                                                                                                                                                                                                                                                                                                                                                             |
|---------------|----------|----------------|----------|-------------|---------------------------------------------------------------------------------------------------------------------------------------------------------------------------------------------------------------------------------------------------------------------------------------------------------------------------------------------------------------------------------------------------------------------------------------------------------------------------------------------|
|               |          |                |          |             | templated                                                                                                                                                                                                                                                                                                                                                                                                                                                                                   |
| C.cajan_23649 | CcWRKY55 | KYP53762.1     | ATWRKY55 | AT2G40740.1 | regulation of transcription, DNA-templated, transcription, DNA-templated                                                                                                                                                                                                                                                                                                                                                                                                                    |
| C.cajan_23650 | CcWRKY70 | KYP53763.1     | ATWRKY70 | AT3G56400.1 | defense response to bacterium, defense response to fungus, induced systemic resistance, jasmonic acid mediated signaling pathway, negative regulation of leaf senescence, negative regulation of transcription, DNA-templated, regulation of defense response, regulation of transcription, DNA-templated, response to chitin, response to jasmonic acid, response to salicylic acid, systemic acquired resistance, salicylic acid mediated signaling pathway, transcription, DNA-templated |
| C.cajan_23812 | CcWRKY32 | KYP53607.1     | ATWRKY32 | AT4G30935.1 | regulation of transcription, DNA-templated, transcription, DNA-templated                                                                                                                                                                                                                                                                                                                                                                                                                    |
| C.cajan_24537 | CcWRKY15 | XP_020230359.1 | ATWRKY15 | AT2G23320.1 | regulation of transcription, DNA-templated, response to chitin, transcription, DNA-templated                                                                                                                                                                                                                                                                                                                                                                                                |
| C.cajan_25091 | CcWRKY51 | XP_020230188.1 | ATWRKY11 | AT4G31550.1 | defense response to bacterium, regulation of transcription, DNA-templated, response to chitin, transcription, DNA-templated                                                                                                                                                                                                                                                                                                                                                                 |
| C.cajan_25148 | CcWRKY23 | KYP52616.1     | ATWRKY23 | AT2G47260.1 | regulation of transcription, DNA-templated, response to auxin, response to nematode, transcription, DNA-templated                                                                                                                                                                                                                                                                                                                                                                           |
| C.cajan_25149 | CcWRKY48 | XP_020230271.1 | ATWRKY23 | AT2G47260.1 | regulation of transcription, DNA-templated, response to auxin, response to nematode, transcription, DNA-templated                                                                                                                                                                                                                                                                                                                                                                           |
| C.cajan_25490 | CcWRKY6  | KYP52183.1     | ATWRKY6  | AT1G62300.1 | cellular response to boron-containing substance deprivation, cellular response to phosphate starvation, ethylene-activated signaling pathway, negative regulation of transcription, DNA-templated, regulation of transcription, DNA-templated, response to chitin, transcription, DNA-templated.                                                                                                                                                                                            |
| C.cajan_25681 | CcWRKY14 | KYP52057.1     | ATWRKY14 | AT1G30650.1 | regulation of transcription, DNA-templated, transcription, DNA-templated                                                                                                                                                                                                                                                                                                                                                                                                                    |
| C.cajan_26080 | CcWRKY72 | KYP50654.1     | ATWRKY72 | AT5G15130.1 | defense response, regulation of transcription, DNA-templated, transcription, DNA-templated                                                                                                                                                                                                                                                                                                                                                                                                  |
| C.cajan_26275 | CcWRKY40 | KYP50443.1     | ATWRKY40 | AT1G80840.1 | defense response to bacterium, defense response to fungus, negative regulation of transcription, DNA-templated, regulation of defense response, regulation of defense response to virus by host, regulation of transcription, DNA-templated, response to chitin, response to molecule of bacterial origin, response to salicylic acid, response to wounding, transcription, DNA-                                                                                                            |

|               |          |                |          |             |                                                                                                                                                                                                                                                                                                                                                                                                         |
|---------------|----------|----------------|----------|-------------|---------------------------------------------------------------------------------------------------------------------------------------------------------------------------------------------------------------------------------------------------------------------------------------------------------------------------------------------------------------------------------------------------------|
|               |          |                |          |             | templated                                                                                                                                                                                                                                                                                                                                                                                               |
| C.cajan_26666 | CcWRKY28 | XP_020232986.1 | ATWRKY28 | AT4G18170.1 | regulation of transcription, DNA-templated, transcription, DNA-templated                                                                                                                                                                                                                                                                                                                                |
| C.cajan_26985 | CcWRKY20 | KYP49857.1     | ATWRKY20 | AT4G26640.2 | positive regulation of transcription, DNA-templated, regulation of transcription, DNA-templated, response to 1-aminocyclopropane-1-carboxylic acid, response to wounding, transcription, DNA-templated                                                                                                                                                                                                  |
| C.cajan_26986 | CcWRKY20 | KYP49858.1     | ATWRKY20 | AT4G26640.2 | positive regulation of transcription, DNA-templated, regulation of transcription, DNA-templated, response to 1-aminocyclopropane-1-carboxylic acid, response to wounding, transcription, DNA-templated                                                                                                                                                                                                  |
| C.cajan_27136 | CcWRKY61 | XP_020232011.1 | ATWRKY72 | AT5G15130.1 | defense response, regulation of transcription, DNA-templated, transcription, DNA-templated                                                                                                                                                                                                                                                                                                              |
| C.cajan_27183 | CcWRKY1  | KYP48145.1     | ATWRKY1  | AT2G04880.1 | positive regulation of transcription, DNA-templated, regulation of transcription, DNA-templated, salicylic acid mediated signaling pathway, transcription, DNA-templated                                                                                                                                                                                                                                |
| C.cajan_27330 | CcWRKY6  | KYP48279.1     | ATWRKY6  | AT1G62300.1 | cellular response to boron-containing substance deprivation, cellular response to phosphate starvation, ethylene-activated signaling pathway, negative regulation of transcription, DNA-templated, regulation of transcription, DNA-templated, response to chitin, transcription, DNA-templated.                                                                                                        |
| C.cajan_27628 | CcWRKY9  | KYP47924.1     | ATWRKY9  | AT1G68150.1 | regulation of transcription, DNA-templated, transcription, DNA-templated                                                                                                                                                                                                                                                                                                                                |
| C.cajan_27637 | CcWRKY14 | KYP47933.1     | ATWRKY14 | AT1G30650.1 | regulation of transcription, DNA-templated, transcription, DNA-templated                                                                                                                                                                                                                                                                                                                                |
| C.cajan_28168 | CcWRKY65 | XP_020234857.1 | ATWRKY35 | AT2G34830.1 | embryo development ending in seed dormancy, pollen development, regulation of transcription, DNA-templated, transcription, DNA-templated                                                                                                                                                                                                                                                                |
| C.cajan_28176 | CcWRKY23 | XP_020234847.1 | ATWRKY23 | AT2G47260.1 | regulation of transcription, DNA-templated, response to auxin, response to nematode, transcription, DNA-templated                                                                                                                                                                                                                                                                                       |
| C.cajan_28195 | CcWRKY33 | KYP45283.1     | ATWRKY33 | AT2G38470.1 | camalexin biosynthetic process, cellular heat acclimation, cellular response to heat, defense response to bacterium, defense response to fungus, positive regulation of autophagy, regulation of transcription, DNA-templated, response to chitin, response to cold, response to heat, response to osmotic stress, response to salt stress, response to water deprivation, transcription, DNA-templated |
| C.cajan_28399 | CcWRKY39 | KYP49226.1     | ATWRKY39 | AT3G04670.1 | regulation of transcription, DNA-templated, transcription,                                                                                                                                                                                                                                                                                                                                              |



|               |          |                |          |             |                                                                                                                                                                                                                                                                                                                                                                                                         |
|---------------|----------|----------------|----------|-------------|---------------------------------------------------------------------------------------------------------------------------------------------------------------------------------------------------------------------------------------------------------------------------------------------------------------------------------------------------------------------------------------------------------|
|               |          |                |          |             | DNA-templated                                                                                                                                                                                                                                                                                                                                                                                           |
| C.cajan_29116 | CcWRKY22 | KYP47600.1     | ATWRKY27 | AT5G52830.1 | defense response to bacterium, negative regulation of transcription, DNA-templated, nitric oxide mediated signal transduction, regulation of transcription, DNA-templated, response to gibberellin, transcription, DNA-templated                                                                                                                                                                        |
| C.cajan_29119 | CcWRKY24 | KYP47603.1     | ATWRKY24 | AT5G41570.1 | regulation of transcription, DNA-templated, transcription, DNA-templated                                                                                                                                                                                                                                                                                                                                |
| C.cajan_29457 | CcWRKY69 | XP_020237140.1 | ATWRKY69 | AT3G58710.2 | regulation of transcription, DNA-templated, transcription, DNA-templated                                                                                                                                                                                                                                                                                                                                |
| C.cajan_29780 | CcWRKY7  | KYP48318.1     | ATWRKY7  | AT4G24240.1 | Encodes a Ca-dependent calmodulin binding protein. Sequence similarity to the WRKY transcription factor gene family.                                                                                                                                                                                                                                                                                    |
| C.cajan_29944 | CcWRKY33 | KYP47430.1     | ATWRKY33 | AT2G38470.1 | camalexin biosynthetic process, cellular heat acclimation, cellular response to heat, defense response to bacterium, defense response to fungus, positive regulation of autophagy, regulation of transcription, DNA-templated, response to chitin, response to cold, response to heat, response to osmotic stress, response to salt stress, response to water deprivation, transcription, DNA-templated |
| C.cajan_30708 | CcWRKY75 | XP_020237079.1 | ATWRKY75 | AT5G13080.1 | atrachoblast differentiation, lateral root development, negative regulation of transcription by RNA polymerase II, regulation of DNA-templated transcription in response to stress, regulation of response to nutrient levels, regulation of transcription, DNA-templated, transcription, DNA-templated                                                                                                 |
| C.cajan_32192 | CcWRKY40 | XP_020237885.1 | ATWRKY40 | AT1G80840.1 | defense response to bacterium, defense response to fungus, negative regulation of transcription, DNA-templated, regulation of defense response, regulation of defense response to virus by host, regulation of transcription, DNA-templated, response to chitin, response to molecule of bacterial origin, response to salicylic acid, response to wounding, transcription, DNA-templated               |
| C.cajan_32591 | CcWRKY70 | XP_020237415.1 | ATWRKY70 | AT3G56400.1 | defense response to bacterium, defense response to fungus, induced systemic resistance, jasmonic acid mediated signaling pathway, negative regulation of leaf senescence, negative regulation of transcription, DNA-templated, regulation of defense response, regulation of transcription, DNA-templated, response to chitin, response to jasmonic acid, response to salicylic acid,                   |

|               |          |                |          |             |                                                                                                                                                                                                                                                                                                  |
|---------------|----------|----------------|----------|-------------|--------------------------------------------------------------------------------------------------------------------------------------------------------------------------------------------------------------------------------------------------------------------------------------------------|
|               |          |                |          |             | systemic acquired resistance, salicylic acid mediated signaling pathway, transcription, DNA-templated                                                                                                                                                                                            |
| C.cajan_32672 | CcWRKY49 | KYP44888.1     | ATWRKY49 | AT5G43290.1 | regulation of transcription, DNA-templated, transcription, DNA-templated                                                                                                                                                                                                                         |
| C.cajan_35299 | CcWRKY6  | KYP43800.1     | ATWRKY6  | AT1G62300.1 | cellular response to boron-containing substance deprivation, cellular response to phosphate starvation, ethylene-activated signaling pathway, negative regulation of transcription, DNA-templated, regulation of transcription, DNA-templated, response to chitin, transcription, DNA-templated. |
| C.cajan_35643 | CcWRKY32 | KYP41386.1     | ATWRKY32 | AT4G30935.1 | regulation of transcription, DNA-templated, transcription, DNA-templated                                                                                                                                                                                                                         |
| C.cajan_36768 | CcWRKY50 | KYP37592.1     | ATWRKY50 | AT5G26170.1 | defense response to fungus, jasmonic acid mediated signaling pathway, regulation of transcription, DNA-templated, transcription, DNA-templated                                                                                                                                                   |
| C.cajan_37436 | CcWRKY47 | XP_020202307.1 | ATWRKY42 | AT4G04450.1 | negative regulation of transcription, DNA-templated, regulation of transcription, DNA-templated, transcription, DNA-templated                                                                                                                                                                    |
| C.cajan_39263 | CcWRKY12 | KYP41601.1     | ATWRKY12 | AT2G44745.1 | regulation of transcription, DNA-templated, transcription, DNA-templated                                                                                                                                                                                                                         |
| C.cajan_39557 | CcWRKY20 | KYP35093.1     | ATWRKY20 | AT4G26640.2 | positive regulation of transcription, DNA-templated, regulation of transcription, DNA-templated, response to 1-aminocyclopropane-1-carboxylic acid, response to wounding, transcription, DNA-templated                                                                                           |
| C.cajan_40644 | CcWRKY51 | KYP34727.1     | ATWRKY51 | AT5G64810.1 | defense response to bacterium, defense response to fungus, jasmonic acid mediated signaling pathway, regulation of transcription, DNA-templated, transcription, DNA-templated                                                                                                                    |
| C.cajan_40968 | CcWRKY65 | KYP38919.1     | ATWRKY65 | AT1G29280.1 | regulation of transcription, DNA-templated, transcription, DNA-templated                                                                                                                                                                                                                         |
| C.cajan_41159 | CcWRKY72 | KYP39644.1     | ATWRKY72 | AT5G15130.1 | defense response, regulation of transcription, DNA-templated, transcription, DNA-templated                                                                                                                                                                                                       |
| C.cajan_41239 | CcWRKY11 | XP_020207515.1 | ATWRKY11 | AT4G31550.1 | defense response to bacterium, regulation of transcription, DNA-templated, response to chitin, transcription, DNA-templated                                                                                                                                                                      |
| C.cajan_41592 | CcWRKY50 | XP_020206759.1 | ATWRKY50 | AT5G26170.1 | defense response to fungus, jasmonic acid mediated signaling pathway, regulation of transcription, DNA-templated, transcription, DNA-templated                                                                                                                                                   |
| C.cajan_42797 | CcWRKY57 | KYP36787.1     | ATWRKY57 | AT1G69310.2 | regulation of transcription, DNA-templated, response to osmotic stress, response to salt stress, response to water deprivation, transcription, DNA-templated                                                                                                                                     |

|               |          |                |          |             |                                                                                                                                                                                                                                                                                                                                                                                                                                                                |
|---------------|----------|----------------|----------|-------------|----------------------------------------------------------------------------------------------------------------------------------------------------------------------------------------------------------------------------------------------------------------------------------------------------------------------------------------------------------------------------------------------------------------------------------------------------------------|
| C.cajan_43040 | CcWRKY12 | XP_020206980.1 | ATWRKY12 | AT2G44745.1 | regulation of transcription, DNA-templated, transcription, DNA-templated                                                                                                                                                                                                                                                                                                                                                                                       |
| C.cajan_43923 | CcWRKY75 | KYP33931.1     | ATWRKY75 | AT5G13080.1 | atrachoblast differentiation, lateral root development, negative regulation of transcription by RNA polymerase II, regulation of DNA-templated transcription in response to stress, regulation of response to nutrient levels, regulation of transcription, DNA-templated, transcription, DNA-templated                                                                                                                                                        |
| C.cajan_44344 | CcWRKY40 | XP_020206660.1 | ATWRKY40 | AT1G80840.1 | defense response to bacterium, defense response to fungus, negative regulation of transcription, DNA-templated, regulation of defense response, regulation of defense response to virus by host, regulation of transcription, DNA-templated, response to chitin, response to molecule of bacterial origin, response to salicylic acid, response to wounding, transcription, DNA-templated                                                                      |
| C.cajan_44345 | CcWRKY40 | KYP34952.1     | ATWRKY18 | AT4G31800.1 | defense response to bacterium, defense response to fungus, regulation of defense response, regulation of defense response to virus by host, regulation of transcription, DNA-templated, response to chitin, response to molecule of bacterial origin, response to salicylic acid, transcription, DNA-templated                                                                                                                                                 |
| C.cajan_47800 | CcWRKY70 | XP_020209514.1 | ATWRKY68 | AT3G62340.1 | regulation of transcription, DNA-templated, transcription, DNA-templated                                                                                                                                                                                                                                                                                                                                                                                       |
| C.cajan_48561 | CcWRKY70 | XP_020209657.1 | ATWRKY70 | AT3G56400.1 | defense response to bacterium, defense response to fungus, induced systemic resistance, jasmonic acid mediated signaling pathway, negative regulation of leaf senescence, negative regulation of transcription, DNA-templated, regulation of defense response, regulation of transcription, DNA-templated, response to chitin, response to jasmonic acid, response to salicylic acid, systemic acquired resistance, salicylic acid mediated signaling pathway, |

Figure SF1: Motif analysis detail of CcWRKYs

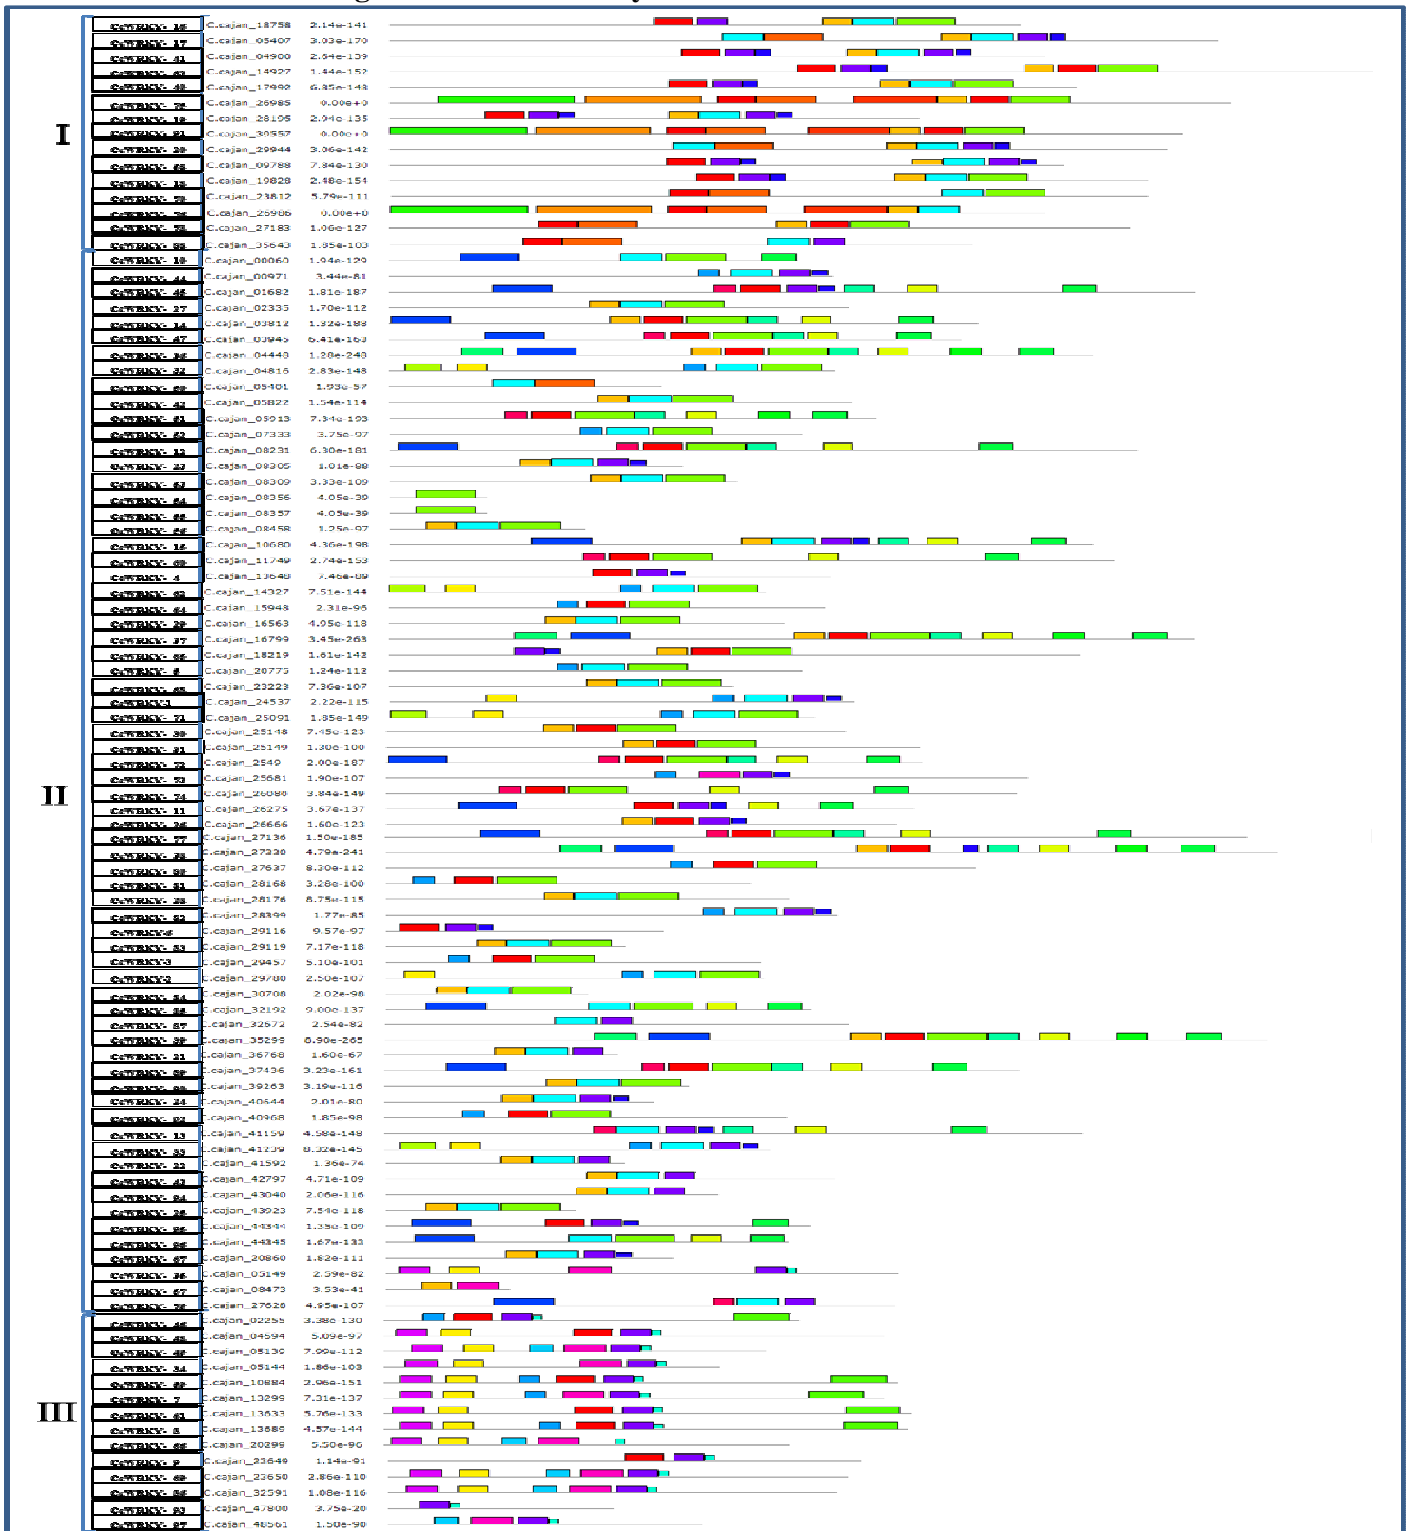

|         |                                                                                             |
|---------|---------------------------------------------------------------------------------------------|
| Motif1  | DDGYQWRKYGQKQVKGNPYPRSYRCT                                                                  |
| Motif2  | ILDDGYRWRKYGQKVVKGSPYPRSYKCT                                                                |
| Motif3  | PGCPVRKQVZRSEEDPSIVITTYEGTHNHPLPAAANSSAST                                                   |
| Motif4  | CPVKKQVZRSLEDPTMVITTY                                                                       |
| Motif5  | KKGEKKVREPRVAFQTRSEVD                                                                       |
| Motif6  | AAITADPNFTAALAAAISSIIIGGA                                                                   |
| Motif7  | TLQAELERVKEENKRLREMLNQVNEBYNALQMHLMEJMQQQ                                                   |
| Motif8  | DGYAWRKYGQKEILNSKFPRSYYRCTHKY                                                               |
| Motif9  | HPNCEVKKLVERSHDGGQITEIVYKGTNHHPKPQPTRRYSSS                                                  |
| Motif10 | MATLSASAPFTITLDTLQPP                                                                        |
| Motif11 | MSPAKLPISRSPCVTIPPLSPTSFLSPVLLSNMKVEPSTTGSLMLHQTAHGSVTSAAASATFPVTACFNSNTVDDRKPSFFFEKPHSRSNM |
| Motif12 | TSAAASMLLSGSMTSSDGJMN                                                                       |
| Motif13 | KKRKNRVKRVVRVPA                                                                             |
| Motif14 | GEHNHPKPPAR                                                                                 |
| Motif15 | JIEELVQGQEVATQLKGLLENP                                                                      |
| Motif16 | PIKKARVSVRACDT                                                                              |
| Motif17 | QMSHPADPDSTPELSPVATNDGDLEGTFGLSNRNTDEVDDDDPFSKRRKMDLGNADI                                   |
| Motif18 | DNHASEKSTQIDGQGKTQAFDSSPFVKNEIADPSNELSLSSPVQMVSSGAGARVEGDLDELNPRSNIATGLQASQVDNRG            |
| Motif19 | LVDNVLSSFKAJSJLNRTGT                                                                        |
| Motif20 | MEEQIAIQEAASEGLKGMEHLIRLL                                                                   |
| Motif21 | SDSDITDIISAPTSATNSPILDLDLDFSLDKVDFDTEFPF                                                    |
| Motif22 | PQIFGQALYNQSKFSGQLQSQD                                                                      |
| Motif23 | VNTGLNLLTANTGSDQSTVDDGISPNAED                                                               |
| Motif24 | RGRHTCT                                                                                     |
| Motif25 | KNRRGCYKRRRTEQTWE                                                                           |

**Table S3: Motifs with their function in CcWRKYs**

| Motifs No. | Sequences                                             | Possible Match                                                                                                               | Predicted function                                                                                                                                                                                                                                                      | References                               |
|------------|-------------------------------------------------------|------------------------------------------------------------------------------------------------------------------------------|-------------------------------------------------------------------------------------------------------------------------------------------------------------------------------------------------------------------------------------------------------------------------|------------------------------------------|
| Motif 1    | DDGYQWRKYGQK<br>QVKGPNPYPRSYR<br>CT                   | Solution Structure Of The C-Terminal Wrky Domain Of Atwrky4                                                                  | defense response, negative regulation of defense response to bacterium, regulation of defense response to fungus, regulation of transcription, DNA-templated, response to ethylene, response to jasmonic acid, response to salicylic acid, transcription, DNA-templated | [Yamasaki et al. 2005]                   |
| Motif 2    | ILDDGYRWRKYGQ<br>KVVKGSPYPRSYR<br>KCT                 | Solution Structure Of The C-Terminal Wrky Domain Of Atwrky4                                                                  | defense response, negative regulation of defense response to bacterium, regulation of defense response to fungus, regulation of transcription, DNA-templated, response to ethylene, response to jasmonic acid, response to salicylic acid, transcription, DNA-templated | [Yamasaki et al. 2005]                   |
| Motif 3    | PGCPVRKQVZRSSE<br>DPSIVITTYEGTHN<br>HPLPAAANSSAST     | Solution Structure Of The C-Terminal Wrky Domain Of Atwrky4                                                                  | defense response, negative regulation of defense response to bacterium, regulation of defense response to fungus, regulation of transcription, DNA-templated, response to ethylene, response to jasmonic acid, response to salicylic acid, transcription, DNA-templated | [Yamasaki et al. 2005]                   |
| Motif 4    | CPVKKQVZRSLEDP<br>TMVITTY                             | Crystal Structure Of The C-terminal Wrky Domain of Atwrky1, An Sa- Induced And Partially Npr1-dependent Transcription Factor | positive regulation of transcription, DNA-templated, regulation of transcription, DNA-templated, salicylic acid mediated signaling pathway, transcription, DNA-templated                                                                                                | [Duan et al. 2007]                       |
| Motif 5    | KKGEKKVREPRVA<br>FQTRSEVD                             | plastid-specific ribosomal proteins in spinach                                                                               | structural and functional roles that the PSRPs play during protein synthesis in chloroplasts                                                                                                                                                                            | [Sharma et al. 2007]                     |
| Motif 6    | AAITADPNFTAALA<br>AAISSIIGGA                          | Flexible IgE epitope-containing domains of Phl p 5                                                                           | cause high allergenic activity                                                                                                                                                                                                                                          | [Göbl et al. 2017]                       |
| Motif 7    | TLQAELERVKEEN<br>KRLREMLNQVNEB<br>YNALQMHLMEJMQ<br>QQ |                                                                                                                              |                                                                                                                                                                                                                                                                         | No similarity found                      |
| Motif 8    | DGYAWRKYGQKEI<br>LNSKFPRSYRCTH<br>KY                  | Crystal Structure Of The C-terminal Wrky Domain of Atwrky1, An Sa- Induced And Partially Npr1-                               | positive regulation of transcription, DNA-templated, regulation of transcription, DNA-templated, salicylic acid mediated signaling pathway, transcription, DNA-templated / PopP2-                                                                                       | [Duan et al. 2007 and Zhang et al. 2017] |

|          |                                                                                                                     |                                                                                                                                                   |                                                                                                                                                           |                         |
|----------|---------------------------------------------------------------------------------------------------------------------|---------------------------------------------------------------------------------------------------------------------------------------------------|-----------------------------------------------------------------------------------------------------------------------------------------------------------|-------------------------|
|          |                                                                                                                     | dependent Transcription Factor / Chain B, Crystal structure of PopP2 in complex with IP6, AcCoA and the WRKY domain of RRS1-R                     | mediated acetylation, an acetyl-cysteine covalent adduct, lending direct support to the 'ping-pong'-like catalytic mechanism proposed for YopJ effectors. |                         |
| Motif 9  | HPNCEVKKLVERS<br>HDGQITEIVYKGTH<br>NHPKPQPTRRYSSS                                                                   | -                                                                                                                                                 | -                                                                                                                                                         |                         |
| Motif 10 | MATLSASAPFTITL<br>DLTQPP                                                                                            | Chain A, Crystal Structure Of Glutathione Transferase Lambda3 From <i>Populus Trichocarpa</i>                                                     | play crucial roles in detoxification processes and secondary metabolism                                                                                   | [Lallement et al. 2010] |
| Motif 11 | MSPAKLPISRSPCV<br>TIPPGLSPTSFLSP<br>VLLSNMKVEPSPTT<br>GSLMLHQAHGS<br>VTSAAATFPVTTA<br>CFNSNTVDDRKPSF<br>FEFKPHSRSNM | Chain A, Crystal Structure Of A 6-Sst6-Sft From <i>Pachysandra Terminalis</i>                                                                     | Stress protectants in plants, and additionally serve as prebiotics with emerging antioxidant properties.                                                  | [Lammens et al. 2012]   |
| Motif 12 | TSAAASMLLSGSM<br>TSSDGJMN                                                                                           | Chain B, Crystal structure of potassium-dependent plant-type L-asparaginase from <i>Phaseolus vulgaris</i> in complex with K <sup>+</sup> cations | The enzymes are heat- stable up to 60 °C and show both isoaspartyl di-peptidase and L-asparaginase activities.                                            | [Borek et al. 2004]     |
| Motif 13 | KKRKNRVKRVVRV<br>PA                                                                                                 | Chain B, Crystal structure of PopP2 in complex with IP6, AcCoA and the WRKY domain of RRS1-R                                                      | PopP2 recognizes the WRKYGQK motif of RRS1-R <sub>WRKY</sub> to position a targeted lysine in the active site for acetylation.                            | [Zhang et al. 2017]     |
| Motif 14 | GEHNHPKPPAR                                                                                                         | Chain B, Crystal structure of PopP2 in complex with IP6, AcCoA and the WRKY domain of RRS1-R                                                      | PopP2 recognizes the WRKYGQK motif of RRS1-R <sub>WRKY</sub> to position a targeted lysine in the active site for acetylation.                            | [Zhang et al. 2017]     |
| Motif 15 | JIEELVQQQEVATQ<br>LKGLLENP                                                                                          | Chain A, Crystal Structure of nuclear proteinaceous RNase P 2 (PRORP2) from <i>A. thaliana</i>                                                    | RNA processing enzymes that catalyze maturation of the 5' end of precursor tRNAs in Eukaryotes.                                                           | [Karasik et al. 2016]   |
| Motif 16 | PIKKARVSVRARC<br>D<br>T                                                                                             | plastid-specific ribosomal proteins                                                                                                               | structural and functional roles that the PSRPs play during protein synthesis in chloroplasts                                                              | [Sharma et al. 2007]    |
| Motif 17 | QMSHPADPDSTPEL<br>SPVATNDG                                                                                          | -                                                                                                                                                 | -                                                                                                                                                         | -                       |

|          |                                                                                                           |                                                       |                                                                                                                                                                                                                                                  |                         |
|----------|-----------------------------------------------------------------------------------------------------------|-------------------------------------------------------|--------------------------------------------------------------------------------------------------------------------------------------------------------------------------------------------------------------------------------------------------|-------------------------|
|          | DLEGTGFLSNRNTD<br>EVDDDDPFSKRRK<br>MDLGNADI                                                               |                                                       |                                                                                                                                                                                                                                                  |                         |
| Motif 18 | DNHASEKSTQIDGQ<br>GKTQAFDSSPFVKN<br>EIADPSN<br>ELSLSSPVQMVSSG<br>AGARVEGDLDELN<br>PRSNIAATGLQASQV<br>DNRG | -                                                     | -                                                                                                                                                                                                                                                | -                       |
| Motif 19 | LVDNVLSSFKKAJS<br>JLNRTGT                                                                                 | Terpene synthases                                     | Responsible for the biosynthesis of the complex chemical defense arsenal of plants and microorganisms                                                                                                                                            | [Kampranis et al. 2007] |
| Motif 20 | MEEQIAIQEAASEG<br>LKGMEHLIRLL                                                                             | Ferredoxin NADP(+) reductase                          | This flavoprotein is the last enzyme in the electron transport chain of linear photosynthesis where electrons are transferred through a series of electron carriers and finally produce NADPH                                                    | [Dorowski et al. 2001]  |
| Motif 21 | SDSDITDIISAPTSAT<br>NSPILDLDFSLDKV<br>DFDTEFPF                                                            | -                                                     | -                                                                                                                                                                                                                                                | -                       |
| Motif 22 | PQIFGQALYNQSKF<br>SGLQLSQD                                                                                | Ribonuclease P (RNase P)                              | Typically these enzymes are ribonucleoproteins with a conserved RNA component responsible for catalysis.                                                                                                                                         | [Howard et al. 2012]    |
| Motif 23 | VNTGLNLLTANTG<br>SDQSTVDDGISPNA<br>ED                                                                     | cardosin B                                            | this enzyme may be involved in the remodeling and/or degradation of the pistil extracellular matrix during pollen tube growth                                                                                                                    | [Vieira et al. 2001]    |
| Motif 24 | RGRHTCT                                                                                                   | TOPLESS (TPL) and TOPLESS-related (TPR) proteins      | In plants, TPL/TPR corepressors regulate development, stress responses, and hormone signaling through interaction with small ethylene response factor-associated amphiphilic repression (EAR) motifs found in diverse transcriptional repressors | [Ke et al. 2015]        |
| Motif 25 | KNRRGCYKRRRTE<br>QTWE                                                                                     | <i>Arabidopsis thaliana</i> (5-Methylthioribose (MTR) | 5-Methylthioribose (MTR) kinase is a key enzyme required for methionine salvage in plants and many bacteria                                                                                                                                      | [Ku et al. 2007]        |



## References

- Yamasaki, K., Kigawa, T., Inoue, M., Tateno, M. Yamasaki, T., Yabuki, T. and Hayami, N. (2005) Solution structure of an *Arabidopsis* WRKY DNA binding domain. *The Plant Cell* 17: 944-956.
- Duan, M.R., Nan, J., Liang, Y.H., Mao, P., Lu, L., Li, L. and Su, X.D. (2007) DNA binding mechanism revealed by high resolution crystal structure of *Arabidopsis thaliana* WRKY1 protein. *Nucleic Acids Res.* 35: 1145-1154.
- Sharma, M.R., Wilson, D.N., Datta, P.P., Barat, C., Schluenzen, F., Fucini, P. and Agrawal, R.K. (2007) Cryo-EM study of the spinach chloroplast ribosome reveals the structural and functional roles of plastid-specific ribosomal proteins. *P. Natl. A. Sci.* 104: 19315-19320.
- Göbl, C., Focke-Tejkl, M., Najafi, N., Schrank, E., Madl, T., Kosol, S. and Valenta, R. (2017) Flexible IgE epitope-containing domains of Phl p 5 cause high allergenic activity. *J. Allergy Clin. Immun.* 140: 1187-1191.
- Zhang, Z.M., Ma, K.W., Gao, L., Hu, Z., Schwizer, S., Ma, W. and Song, J. (2017) Mechanism of host substrate acetylation by a YopJ family effector. *Nat. plants* 3: 17115.
- Lallement, P.A., Meux, E., Gualberto, J.M., Prosper, P., Didierjean, C., Saul, F. and Hecker, A. (2014) Structural and enzymatic insights into Lambda glutathione transferases from *Populus trichocarpa*, monomeric enzymes constituting an early divergent class specific to terrestrial plants. *Biochem. J.* 462: 39-52.
- Lammens, W., Le Roy, K., Yuan, S., Vergauwen, R., Rabijns, A., Van Laere, A. and Van den Ende, W. (2012) Crystal structure of 6-SST/6-SFT from *Pachysandra terminalis*, a plant fructan biosynthesizing enzyme in complex with its acceptor substrate 6-kestose. *The Plant J.* 70: 205-219.
- Borek, D., Michalska, K., Brzezinski, K., Kisiel, A., Podkowinski, J., Bonthron, D.T. and Jaskolski, M. (2004) Expression, purification and catalytic activity of *Lupinus luteus* asparagine  $\beta$ -amidohydrolase and its *Escherichia coli* homolog. *The FEBS J.* 271: 3215-3226.
- Karasik, A., Shanmuganathan, A., Howard, M.J., Fierke, C.A. and Koutmos, M. (2016) Nuclear protein-only Ribonuclease P2 structure and biochemical characterization provide insight into the conserved properties of tRNA 5' end processing enzymes. *J. Mol. Biol.* 428: 26-40.

Sharma, M.R., Wilson, D.N., Datta, P.P., Barat, C., Schluenzen, F. Fucini, P. and Agrawal, R.K. (2007) Cryo-EM study of the spinach chloroplast ribosome reveals the structural and functional roles of plastid-specific ribosomal proteins. *P. Natl. A. Sci.* 104: 19315-19320.

Kampranis, S.C., Ioannidis, D., Purvis, A., Mahrez, W., Ninga, E., Katerelos, N.A. and Goodenough, P.W. (2007) Rational conversion of substrate and product specificity in a *Salvia* monoterpene synthase: structural insights into the evolution of terpene synthase function. *The Plant Cell* 19: 1994-2005.

Dorowski, A., Hofmann, A., Steegborn, C., Boicu, M. and Huber, R. (2001) Crystal structure of paprika ferredoxin-NADP+ reductase Implications for the electron transfer pathway. *J. Biol. Chem.* 276: 9253-9263.

Howard, M.J., Lim, W.H., Fierke, C.A. and Koutmos, M. (2012) Mitochondrial ribonuclease P structure provides insight into the evolution of catalytic strategies for precursor-tRNA 5' processing. *P. Natl. A. Sci.* 109: 16149-16154.

Vieira, M., Pissarra, J., Verissimo, P., Castanheira, P., Costa, Y., Pires, E. and Faro, C. (2001) Molecular cloning and characterization of cDNA encoding cardosin B, an aspartic proteinase accumulating extracellularly in the transmitting tissue of *Cynara cardunculus* L. *Plant Mol. Biol.* 45: 529-539.

Ke, J., Ma, H., Gu, X., Thelen, A., Brunzelle, J.S., Li, J. and Melcher, K. (2015) Structural basis for recognition of diverse transcriptional repressors by the TOPLESS family of corepressors. *Science Advances* 1: e1500107.

Ku, S.Y., Cornell, K.A. and Howell, P.L. (2007) Structure of *Arabidopsis thaliana* 5-methylthioribose kinase reveals a more occluded active site than its bacterial homolog. *BMC Struct. Biol.* 7: 70.



**Table S4: CcWRKYs physicochemical analysis**

| S. No. | Accession no. | AAR | MW       | PI   | TA    | EC    | II    | AI    | GRAVY  |
|--------|---------------|-----|----------|------|-------|-------|-------|-------|--------|
| 1.     | C.cajan_00060 | 278 | 31165.06 | 8.57 | 4336  | 23295 | 50.50 | 64.46 | -0.772 |
| 2.     | C.cajan_00971 | 302 | 33949.38 | 9.68 | 4715  | 16555 | 58.98 | 64.87 | -0.804 |
| 3.     | C.cajan_01682 | 603 | 65777.32 | 6.17 | 9102  | 35590 | 50.54 | 60.40 | -0.695 |
| 4.     | C.cajan_02255 | 643 | 70224.20 | 7.25 | 9687  | 52800 | 55.37 | 59.83 | -0.522 |
| 5.     | C.cajan_02335 | 313 | 35301.07 | 6.27 | 4858  | 23630 | 57.71 | 55.08 | -0.861 |
| 6.     | C.cajan_03812 | 400 | 44226.72 | 9.27 | 6177  | 27890 | 49.42 | 73.95 | -0.294 |
| 7.     | C.cajan_03945 | 389 | 43186.79 | 7.94 | 6015  | 28475 | 60.41 | 76.04 | -0.489 |
| 8.     | C.cajan_04448 | 478 | 51578.33 | 6.50 | 7138  | 16305 | 42.62 | 68.24 | -0.603 |
| 9.     | C.cajan_04594 | 344 | 38516.08 | 6.41 | 5319  | 31650 | 55.64 | 66.34 | -0.576 |
| 10.    | C.cajan_04816 | 304 | 32961.73 | 9.64 | 4639  | 14690 | 43.85 | 66.04 | -0.545 |
| 11.    | C.cajan_04900 | 452 | 49718.55 | 6.83 | 6884  | 37735 | 45.73 | 63.63 | -0.668 |
| 12.    | C.cajan_05139 | 263 | 29741.10 | 6.83 | 4100  | 39795 | 48.67 | 60.80 | -0.860 |
| 13.    | C.cajan_05144 | 231 | 26096.32 | 6.43 | 3659  | 30160 | 46.19 | 81.90 | -0.361 |
| 14.    | C.cajan_05149 | 348 | 39214.58 | 5.53 | 5389  | 51505 | 45.75 | 66.09 | -0.672 |
| 15.    | C.cajan_05401 | 185 | 21369.70 | 6.29 | 2941  | 22140 | 42.34 | 65.84 | -0.848 |
| 16.    | C.cajan_05407 | 571 | 62356.32 | 6.48 | 8543  | 53205 | 64.76 | 47.67 | -0.877 |
| 17.    | C.cajan_05822 | 586 | 65482.62 | 6.22 | 8933  | 48415 | 65.59 | 46.95 | -1.042 |
| 18.    | C.cajan_05913 | 617 | 66563.98 | 5.75 | 9158  | 33640 | 53.63 | 61.10 | -0.655 |
| 19.    | C.cajan_07333 | 652 | 71549.55 | 5.68 | 9804  | 55975 | 59.64 | 51.06 | -0.874 |
| 20.    | C.cajan_08231 | 509 | 55435.06 | 8.36 | 7704  | 28140 | 44.77 | 66.90 | -0.551 |
| 21.    | C.cajan_08305 | 199 | 22617.64 | 6.13 | 3062  | 34630 | 56.07 | 42.56 | -1.078 |
| 22.    | C.cajan_08309 | 236 | 26807.67 | 8.79 | 3707  | 29450 | 51.55 | 59.45 | -0.742 |
| 23.    | C.cajan_08356 | 67  | 8122.45  | 7.77 | 1104  | 21095 | 66.99 | 49.40 | -0.907 |
| 24.    | C.cajan_08357 | 66  | 7935.92  | 7.77 | 1080  | 15595 | 67.86 | 50.15 | -0.908 |
| 25.    | C.cajan_08458 | 133 | 15347.11 | 8.42 | 2124  | 16055 | 47.80 | 65.86 | -0.741 |
| 26.    | C.cajan_08473 | 84  | 9884.19  | 9.52 | 1379  | 12950 | 52.41 | 64.88 | -0.677 |
| 27.    | C.cajan_09788 | 466 | 51511.05 | 8.85 | 7093  | 37860 | 47.03 | 52.73 | -0.914 |
| 28.    | C.cajan_10680 | 478 | 52303.75 | 8.59 | 7258  | 25035 | 41.82 | 68.49 | -0.515 |
| 29.    | C.cajan_10884 | 354 | 40497.55 | 5.75 | 5614  | 28795 | 56.02 | 65.00 | -0.666 |
| 30.    | C.cajan_11749 | 493 | 53784.75 | 5.92 | 7412  | 41995 | 57.69 | 64.16 | -0.587 |
| 31.    | C.cajan_13299 | 344 | 38313.90 | 6.12 | 5302  | 30535 | 49.24 | 67.15 | -0.593 |
| 32.    | C.cajan_13633 | 363 | 40342.75 | 5.56 | 5562  | 30035 | 66.95 | 62.62 | -0.675 |
| 33.    | C.cajan_13648 | 300 | 33712.87 | 5.88 | 4685  | 39795 | 39.89 | 62.73 | -0.676 |
| 34.    | C.cajan_13689 | 361 | 40889.41 | 5.63 | 5624  | 45755 | 49.87 | 60.25 | -0.758 |
| 35.    | C.cajan_14327 | 256 | 28174.21 | 9.96 | 3971  | 14815 | 40.96 | 70.55 | -0.619 |
| 36.    | C.cajan_14927 | 678 | 73688.00 | 5.87 | 10082 | 47580 | 53.15 | 55.25 | -0.840 |
| 37.    | C.cajan_15948 | 296 | 32190.45 | 8.50 | 4431  | 20315 | 52.63 | 51.15 | -0.852 |
| 38.    | C.cajan_16563 | 269 | 29968.15 | 6.49 | 4127  | 23170 | 59.53 | 54.42 | -0.898 |
| 39.    | C.cajan_16799 | 547 | 58897.66 | 6.81 | 8162  | 25815 | 45.54 | 64.08 | -0.646 |
| 40.    | C.cajan_17992 | 474 | 51694.16 | 6.72 | 7110  | 38765 | 44.70 | 55.59 | -0.833 |
| 41.    | C.cajan_18219 | 469 | 51362.19 | 6.31 | 7066  | 29840 | 43.62 | 57.21 | -0.740 |
| 42.    | C.cajan_18758 | 436 | 48066.53 | 7.00 | 6656  | 29130 | 61.01 | 59.29 | -0.828 |
| 43.    | C.cajan_19828 | 523 | 57924.54 | 6.63 | 7934  | 58580 | 55.44 | 47.88 | -0.939 |
| 44.    | C.cajan_20299 | 279 | 32429.43 | 6.86 | 4462  | 34755 | 54.37 | 60.43 | -0.936 |
| 45.    | C.cajan_20775 | 281 | 31041.30 | 7.75 | 4276  | 25690 | 45.61 | 46.55 | -0.867 |
| 46.    | C.cajan_20860 | 195 | 22018.82 | 8.56 | 3047  | 18700 | 43.42 | 59.03 | -0.792 |
| 47.    | C.cajan_23223 | 234 | 26551.87 | 9.10 | 3671  | 24200 | 54.95 | 56.67 | -0.670 |
| 48.    | C.cajan_23649 | 322 | 35792.89 | 5.86 | 4923  | 26025 | 60.32 | 59.13 | -0.743 |
| 49.    | C.cajan_23650 | 313 | 35582.20 | 5.65 | 4892  | 31650 | 50.57 | 62.94 | -0.810 |
| 50.    | C.cajan_23812 | 515 | 55943.83 | 8.71 | 7804  | 32025 | 52.85 | 65.67 | -0.756 |

|     |               |     |          |       |      |       |       |       |        |
|-----|---------------|-----|----------|-------|------|-------|-------|-------|--------|
| 51. | C.cajan_24537 | 316 | 34749.45 | 9.68  | 4872 | 19285 | 46.05 | 66.08 | -0.660 |
| 52. | C.cajan_25091 | 289 | 31698.83 | 10.09 | 4407 | 14815 | 65.08 | 57.44 | -0.671 |
| 53. | C.cajan_25148 | 316 | 34399.93 | 6.27  | 4747 | 24535 | 55.01 | 58.07 | -0.812 |
| 54. | C.cajan_25149 | 367 | 40619.21 | 5.87  | 5610 | 24660 | 62.15 | 58.17 | -0.778 |
| 55. | C.cajan_25490 | 369 | 40685.23 | 9.46  | 5699 | 27180 | 35.22 | 71.22 | -0.560 |
| 56. | C.cajan_25681 | 442 | 48609.27 | 5.61  | 6645 | 41285 | 52.18 | 51.70 | -0.859 |
| 57. | C.cajan_26080 | 434 | 47718.53 | 9.31  | 6630 | 39935 | 53.71 | 66.11 | -0.544 |
| 58. | C.cajan_26275 | 363 | 40316.57 | 8.67  | 5637 | 28795 | 43.67 | 70.88 | -0.582 |
| 59. | C.cajan_26666 | 351 | 38491.30 | 7.29  | 5290 | 24995 | 55.54 | 52.79 | -0.837 |
| 60. | C.cajan_26985 | 580 | 62857.27 | 6.32  | 8613 | 33850 | 44.93 | 52.31 | -0.822 |
| 61. | C.cajan_26986 | 451 | 49603.87 | 7.26  | 6821 | 8890  | 48.93 | 55.57 | -0.845 |
| 62. | C.cajan_27136 | 594 | 64825.50 | 6.23  | 8935 | 34880 | 54.76 | 57.53 | -0.863 |
| 63. | C.cajan_27183 | 510 | 56077.80 | 6.00  | 7749 | 26775 | 48.95 | 63.59 | -0.923 |
| 64. | C.cajan_27330 | 606 | 65713.48 | 5.83  | 9005 | 23295 | 48.52 | 59.64 | -0.740 |
| 65. | C.cajan_27628 | 346 | 39614.59 | 5.53  | 5492 | 27555 | 60.22 | 64.25 | -0.880 |
| 66. | C.cajan_27637 | 401 | 43916.38 | 5.22  | 6029 | 37400 | 50.06 | 62.52 | -0.714 |
| 67. | C.cajan_28168 | 248 | 28445.62 | 5.16  | 3932 | 21805 | 62.13 | 54.64 | -1.044 |
| 68. | C.cajan_28176 | 274 | 30528.92 | 7.69  | 4202 | 23630 | 64.46 | 54.05 | -0.779 |
| 69. | C.cajan_28195 | 365 | 40489.16 | 9.13  | 5567 | 35090 | 43.30 | 47.53 | -0.933 |
| 70. | C.cajan_28399 | 307 | 34204.75 | 9.77  | 4766 | 13575 | 43.08 | 66.35 | -0.745 |
| 71. | C.cajan_29116 | 189 | 20704.68 | 4.74  | 2832 | 24200 | 46.86 | 51.11 | -0.832 |
| 72. | C.cajan_29119 | 163 | 18755.27 | 9.32  | 2618 | 20190 | 33.29 | 62.15 | -0.803 |
| 73. | C.cajan_29457 | 255 | 27545.69 | 6.01  | 3812 | 28670 | 58.11 | 58.98 | -0.669 |
| 74. | C.cajan_29780 | 257 | 28904.90 | 9.91  | 4060 | 16305 | 55.01 | 63.35 | -0.804 |
| 75. | C.cajan_29944 | 536 | 59680.20 | 7.20  | 8140 | 60195 | 57.80 | 44.01 | -0.968 |
| 76. | C.cajan_30708 | 137 | 16184.36 | 9.58  | 2267 | 28545 | 59.48 | 68.91 | -0.877 |
| 77. | C.cajan_32192 | 289 | 32120.93 | 7.04  | 4471 | 19285 | 49.05 | 71.80 | -0.609 |
| 78. | C.cajan_32591 | 305 | 34928.57 | 5.44  | 4794 | 31900 | 70.43 | 57.80 | -0.832 |
| 79. | C.cajan_32672 | 315 | 35082.96 | 7.11  | 4891 | 49765 | 39.48 | 77.43 | -0.399 |
| 80. | C.cajan_35299 | 599 | 64850.05 | 6.04  | 8948 | 20315 | 49.48 | 62.64 | -0.671 |
| 81. | C.cajan_35643 | 396 | 43206.35 | 8.87  | 6020 | 28015 | 54.89 | 62.25 | -0.794 |
| 82. | C.cajan_36768 | 159 | 18412.16 | 5.24  | 2511 | 23045 | 28.05 | 45.22 | -1.083 |
| 83. | C.cajan_37436 | 431 | 47337.47 | 7.61  | 6609 | 18045 | 48.61 | 75.66 | 0.528  |
| 84. | C.cajan_39263 | 207 | 23386.69 | 8.86  | 3196 | 29825 | 48.88 | 50.72 | -0.904 |
| 85. | C.cajan_39557 | 547 | 59098.58 | 7.32  | 8157 | 33850 | 46.59 | 59.71 | -0.675 |
| 86. | C.cajan_40644 | 183 | 20843.81 | 8.25  | 2832 | 25120 | 49.43 | 41.58 | -1.011 |
| 87. | C.cajan_40968 | 273 | 30611.03 | 5.03  | 4212 | 38305 | 66.16 | 52.12 | -0.908 |
| 88. | C.cajan_41159 | 474 | 52340.95 | 7.91  | 7256 | 37650 | 51.89 | 63.86 | -0.597 |
| 89. | C.cajan_41239 | 262 | 28999.07 | 9.56  | 4077 | 14690 | 46.73 | 68.93 | -0.626 |
| 90. | C.cajan_41592 | 161 | 18629.15 | 5.54  | 2520 | 27055 | 35.86 | 36.83 | -1.338 |
| 91. | C.cajan_42797 | 305 | 33556.07 | 6.46  | 4601 | 34295 | 62.55 | 50.00 | -0.818 |
| 92. | C.cajan_43040 | 226 | 25526.04 | 6.70  | 3477 | 32805 | 51.60 | 52.17 | -0.897 |
| 93. | C.cajan_43923 | 129 | 14756.74 | 9.81  | 2071 | 16055 | 29.25 | 62.56 | -0.881 |
| 94. | C.cajan_44344 | 288 | 32462.91 | 8.19  | 4571 | 18700 | 47.60 | 81.87 | -0.642 |
| 95. | C.cajan_44345 | 273 | 30754.76 | 8.76  | 4314 | 20315 | 56.63 | 77.47 | -0.565 |
| 96. | C.cajan_47800 | 153 | 17708.64 | 4.86  | 2412 | 16640 | 62.00 | 64.25 | -0.527 |
| 97. | C.cajan_48561 | 214 | 24731.62 | 5.70  | 3383 | 35215 | 55.54 | 55.98 | -0.739 |

**Abbreviation:-** AAR-Amino acid residue, MW- Molecular weight, PI- Isoelectric Point, TA- Total number of atoms, EC- Extinction coefficients, II- Instability index, AI- Aliphatic index, A- Aromaticity, GRAVY- Grand average of hydropathicity.

**Table S5: Expression profile of pathogen responsive *CcWRKY* genes in pigeonpea cultivars Asha and Bahar under different treatments**

| Treatments | Gene regulation       | CcWRKY genes in pigeonpea cultivars                                                                                                                               |
|------------|-----------------------|-------------------------------------------------------------------------------------------------------------------------------------------------------------------|
| <b>P</b>   | <b>Up-regulated</b>   | <b>Asha:</b> <i>CcWRKYs</i> 1, 3, 4, 5, 7, 10, 11, 12, 13, 14, 15, 20, 21, 22, 23, 24, 25, 26, 27, 28, 29, 30, 31, 32, 33, 34, 35, 36, 37, 38, 39, 40, 41, 42, 43 |
|            |                       | <b>Bahar:</b> <i>CcWRKYs</i> 1, 3, 4, 5, 7, 10, 11, 12, 13, 14, 15, 21, 23, 24, 25, 26, 27, 28, 29, 30, 31, 32, 35, 38, 40, 41                                    |
|            | <b>Down regulated</b> | <b>Asha:</b> None                                                                                                                                                 |
|            |                       | <b>Bahar:</b> <i>CcWRKYs</i> 20, 22, 33, 34, 36, 37, 39, 42, 43                                                                                                   |
| <b>S</b>   | <b>Up-regulated</b>   | <b>Asha:</b> <i>CcWRKYs</i> 1, 3, 4, 5, 7, 10, 11, 12, 13, 14, 15, 20, 21, 22, 23, 24, 26, 27, 28, 29, 30, 31, 32, 33, 34, 35, 36, 37, 38, 39, 40, 41, 42, 43     |
|            |                       | <b>Bahar:</b> <i>CcWRKYs</i> 1, 3, 4, 5, 7, 10, 11, 12, 13, 14, 15, 20, 23, 24, 25, 26, 27, 28, 29, 38                                                            |
|            | <b>Down regulated</b> | <b>Asha:</b> <i>CcWRKYs</i> 25                                                                                                                                    |
|            |                       | <b>Bahar:</b> <i>CcWRKYs</i> 21, 22, 30, 31, 32, 33, 34, 35, 36, 37, 39, 40, 41, 42, 43                                                                           |
| <b>O</b>   | <b>Up-regulated</b>   | <b>Asha:</b> <i>CcWRKYs</i> 1, 3, 4, 5, 7, 10, 11, 12, 13, 14, 15, 20, 21, 22, 23, 24, 25, 26, 27, 28, 29, 30, 31, 32, 33, 34, 35, 36, 37, 38, 39, 40, 41, 42, 43 |
|            |                       | <b>Bahar:</b> <i>CcWRKYs</i> 1, 3, 4, 5, 7, 10, 11, 12, 13, 14, 15, 20, 21, 23, 24, 25, 26, 27, 28, 29, 30, 31, 32, 33, 34, 35, 36, 37, 39, 40, 41, 42, 43        |
|            | <b>Down regulated</b> | <b>Asha:</b> None                                                                                                                                                 |
|            |                       | <b>Bahar:</b> <i>CcWRKYs</i> 22, 38                                                                                                                               |
| <b>PS</b>  | <b>Up-regulated</b>   | <b>Asha:</b> <i>CcWRKYs</i> 1, 3, 4, 5, 7, 10, 11, 12, 13, 14, 15, 20, 21, 22, 23, 24, 26, 27, 28, 29, 30, 31, 32, 33, 34, 35, 36, 37, 38, 39, 40, 41, 42, 43     |
|            |                       | <b>Bahar:</b> <i>CcWRKYs</i> 1, 3, 4, 5, 7, 10, 11, 12, 13, 14, 15, 20, 23, 24, 25, 26, 27, 28, 29, 30, 35, 38, 40, 41, 43                                        |
|            | <b>Down regulated</b> | <b>Asha:</b> <i>CcWRKY</i> 25                                                                                                                                     |
|            |                       | <b>Bahar:</b> <i>CcWRKYs</i> 21, 22, 31, 32, 33, 34, 36, 37, 39, 42                                                                                               |
| <b>PO</b>  | <b>Up-regulated</b>   | <b>Asha:</b> <i>CcWRKYs</i> 1, 3, 4, 5, 7, 10, 11, 12, 13, 14, 15, 20, 21, 22, 23, 24, 26, 27, 28, 29, 30, 31, 32, 33, 34, 35, 36, 37, 38, 39, 40, 41, 42, 43     |
|            |                       | <b>Bahar:</b> <i>CcWRKYs</i> 1, 3, 4, 5, 7, 10, 11, 12, 13, 14, 15, 20, 23, 24, 25, 26, 27, 28, 29, 35, 38, 41, 43                                                |
|            | <b>Down regulated</b> | <b>Asha:</b> <i>CcWRKY</i> 25                                                                                                                                     |
|            |                       | <b>Bahar:</b> <i>CcWRKYs</i> 21, 22, 30, 31, 32, 33, 34, 36, 37, 39, 40, 42                                                                                       |
| <b>SO</b>  | <b>Up-regulated</b>   | <b>Asha:</b> <i>CcWRKY</i> -<br>1,3,4,5,7,10,11,12,13,14,15,20,21,22,23,24,25,26,27,28,29,30,<br>31,32,33,34,35,36,37,38,39,40,41,42,43                           |
|            |                       | <b>Bahar:</b> <i>CcWRKYs</i> 1, 3, 4, 5, 7, 10, 11, 12, 13, 14, 15, 20, 23, 24, 25, 26, 27, 28, 29, 30, 35, 36, 43                                                |
|            | <b>Down regulated</b> | <b>Asha:</b> None                                                                                                                                                 |
|            |                       | <b>Bahar:</b> <i>CcWRKYs</i> 21, 22, 31, 32, 33, 34, 37, 38, 39, 40, 41, 42                                                                                       |
| <b>PSO</b> | <b>Up-regulated</b>   | <b>Asha:</b> <i>CcWRKYs</i> 1, 3, 4, 5, 7, 10, 11, 12, 13, 14, 15, 20, 21, 22, 23, 24, 25, 26, 27, 28, 29, 30, 31, 32, 33, 34, 35, 36, 37, 38, 39, 41, 42, 43     |
|            |                       | <b>Bahar:</b> <i>CcWRKYs</i> 1, 3, 4, 5, 7, 10, 11, 12, 13, 14, 15, 20, 23, 24, 25, 26, 27, 28, 29                                                                |
|            | <b>Down regulated</b> | <b>Asha:</b> <i>CcWRKY</i> 40                                                                                                                                     |
|            |                       | <b>Bahar:</b> <i>CcWRKYs</i> 21, 22, 30, 31, 32, 33, 34, 35, 36, 37, 38, 39, 40, 41, 42, 43                                                                       |

**Table S6: Fold change of pathogen responsive *CcWRKY* genes in pigeonpea cultivars Asha (A) and Bahar (B) under different treatments**

| Treatments | Cc WRKY genes fold change                                                 |                                                                                              |                                                         |                                           |                           |                            |                       |                 |                       |                 |                   |                                   |
|------------|---------------------------------------------------------------------------|----------------------------------------------------------------------------------------------|---------------------------------------------------------|-------------------------------------------|---------------------------|----------------------------|-----------------------|-----------------|-----------------------|-----------------|-------------------|-----------------------------------|
|            | < 1                                                                       | 1-5                                                                                          | 5-10                                                    | 10-15                                     | 15-20                     | 20-25                      | 25-30                 | 30-35           | 35-40                 | 40-45           | 45-50             | >50                               |
| <b>AP</b>  |                                                                           | <i>CcWRKYs</i> 3, 5, 11, 14, 15, 20, 21, 23, 24, 25, 26, 27, 29, 34, 35, 37, 38, 40, 42      | <i>CcWRKYs</i> 10, 13, 28, 31, 33, 36, 41               | <i>CcWRKYs</i> 1, 12, 32, 43              | <i>CcWRKYs</i> 7, 22      | <i>CcWRKY30</i>            |                       |                 |                       |                 |                   | <i>CcWRKYs</i> 4, 39              |
| <b>BP</b>  | <i>CcWRKYs</i> 20, 22, 33, 34, 36, 37, 39, 42, 43                         | <i>CcWRKYs</i> 1, 3, 4, 5, 7, 10, 14, 15, 21, 23, 24, 25, 26, 27, 28, 29, 30, 32, 35, 38, 40 | <i>CcWRKYs</i> 12, 13                                   | <i>CcWRKYs</i> 11, 31                     |                           |                            | <i>CcWRKYs</i> 41     |                 |                       |                 |                   |                                   |
| <b>AS</b>  | <i>CcWRKYs</i> 25                                                         | <i>CcWRKYs</i> 5, 14, 24, 27, 33, 42                                                         | <i>CcWRKYs</i> 1, 3, 11, 13, 15, 20, 26, 35, 36, 40, 41 | <i>CcWRKYs</i> 22, 28, 31, 32, 34, 38, 43 | <i>CcWRKYs</i> 30, 37     | <i>CcWRKYs</i> 10, 12, 29, | <i>CcWRKY21</i>       | <i>CcWRKY39</i> |                       | <i>CcWRKY23</i> |                   | <i>CcWRKYs</i> 4, 7               |
| <b>BS</b>  | <i>CcWRKYs</i> 21, 22, 30, 31, 32, 33, 34, 35, 36, 37, 39, 40, 41, 42, 43 | <i>CcWRKYs</i> 1, 3, 4, 5, 7, 15, 20, 23, 25, 26, 27, 28, 29                                 | <i>CcWRKYs</i> 10, 12, 24                               | <i>CcWRKYs</i> 11, 13                     |                           |                            | <i>CcWRKYs</i> 14, 38 |                 |                       |                 |                   |                                   |
| <b>AO</b>  |                                                                           | <i>CcWRKYs</i> 7, 14, 20, 25, 27, 28, 32, 41, 42                                             | <i>CcWRKYs</i> 1, 4, 5, 13, 23, 30, 36, 38, 40, 43      | <i>CcWRKYs</i> 15, 24, 29,                | <i>CcWRKYs</i> 22, 33     | <i>CcWRKY3</i>             | <i>CcWRKYs</i> 35, 39 |                 | <i>CcWRKYs</i> 26, 34 |                 | <i>CcWRKYs</i> 21 | <i>CcWRKYs</i> 10, 11, 12, 31, 37 |
| <b>BO</b>  | <i>CcWRKYs</i> 22, 38                                                     | <i>CcWRKYs</i> 1, 3, 4, 5, 7, 10, 27, 29, 30, 32, 35, 42                                     | <i>CcWRKYs</i> 12, 20, 23, 28, 34, 36                   | <i>CcWRKYs</i> 15, 21, 33, 37, 40, 41     | <i>CcWRKY13</i>           | <i>CcWRKYs</i> 11, 14      | <i>CcWRKYs</i> 25, 39 |                 | <i>CcWRKY31</i>       |                 |                   | <i>CcWRKYs</i> 24, 26, 43         |
| <b>APS</b> | <i>CcWRKY25</i>                                                           | <i>CcWRKYs</i> 1, 3, 4, 5, 7, 14, 15, 22, 23, 24, 27, 28, 29, 30, 32, 35, 38, 39, 41, 42, 43 | <i>CcWRKYs</i> 20, 26, 31, 33, 36                       | <i>CcWRKYs</i> 13, 37                     | <i>CcWRKYs</i> 10, 11, 21 | <i>CcWRKY</i> 40           | <i>CcWRKYs</i> 34     |                 |                       |                 | <i>CcWRKY12</i>   |                                   |
| <b>BPS</b> | <i>CcWRKYs</i> 21, 22, 31, 32, 33, 34,                                    | <i>CcWRKYs</i> 3, 4, 5, 7, 15, 20, 23, 24, 25, 27, 28,                                       | <i>CcWRKYs</i> 26, 30                                   | <i>CcWRKYs</i> 1, 11                      |                           | <i>CcWRKY13</i>            |                       |                 |                       |                 | <i>CcWRKY14</i>   | <i>CcWRKY38</i>                   |

|             |                                                                                |                                                                             |                                                        |                                       |                                            |                            |                            |                       |                  |                  |                            |                  |
|-------------|--------------------------------------------------------------------------------|-----------------------------------------------------------------------------|--------------------------------------------------------|---------------------------------------|--------------------------------------------|----------------------------|----------------------------|-----------------------|------------------|------------------|----------------------------|------------------|
|             | 36, 37, 39, 42                                                                 | 29,35, 40, 41, 43                                                           |                                                        |                                       |                                            |                            |                            |                       |                  |                  |                            |                  |
| <b>APO</b>  | <i>CcWRKY</i> 25                                                               | <i>CcWRKY</i> s 1, 3, 4, 5, 14, 24, 42, 43                                  | <i>CcWRKY</i> s 7, 13, 15, 22, 26, 27, 37, 38, 40      | <i>CcWRKY</i> s 21, 32, 36, 41        | <i>CcWRKY</i> s 11, 23, 29,                | <i>CcWRKY</i> s 20, 28, 31 | <i>CcWRKY</i> s 10, 33, 35 | <i>CcWRKY</i> 34      | <i>CcWRKY</i> 30 | <i>CcWRKY</i> 12 |                            | <i>CcWRKY</i> 39 |
| <b>BPO</b>  | <i>CcWRKY</i> s 21, 22, 30, 31, 32, 33, 34, 36, 37, 39, 40, 42                 | <i>CcWRKY</i> s 3, 4, 5, 10, 15, 20, 23, 24, 25, 26, 27, 28, 29, 35, 41, 43 | <i>CcWRKY</i> s 7, 11, 12, 14                          | <i>CcWRKY</i> 13                      |                                            | <i>CcWRKY</i> 1            |                            |                       |                  |                  |                            | <i>CcWRKY</i> 14 |
| <b>ASO</b>  |                                                                                | <i>CcWRKY</i> s 3, 5, 12, 14, 15, 24, 38, 42                                | <i>CcWRKY</i> s 4, 39, 40                              | <i>CcWRKY</i> s 1, 10, 23, 27, 33, 36 | <i>CcWRKY</i> s 11, 26, 28, 31, 32, 41, 43 | <i>CcWRKY</i> s 29, 35     | <i>CcWRKY</i> s 13, 22     | <i>CcWRKY</i> s 7, 37 | <i>CcWRKY</i> 20 | <i>CcWRKY</i> 30 | <i>CcWRKY</i> s 21, 25, 34 |                  |
| <b>BSO</b>  | <i>CcWRKY</i> s 21, 22, 31, 32, 33, 34, 37, 38, 39, 40, 41, 42                 | <i>CcWRKY</i> s 4, 5, 7, 10,11, 13, 15, 20, 23, 25, 27, 28, 30, 35, 36, 43  | <i>CcWRKY</i> s 3, 12, 24, 29                          | <i>CcWRKY</i> s 1, 26                 |                                            |                            | <i>CcWRKY</i> 14           |                       |                  |                  |                            |                  |
| <b>APSO</b> | <i>CcWRKY</i> 40                                                               | <i>CcWRKY</i> s 1, 3, 4, 5, 21, 24, 25, 26, 27, 33, 35, 37, 38, 41, 42, 43  | <i>CcWRKY</i> s 11, 14, 15, 20, 22, 28, 30, 31, 32, 36 | <i>CcWRKY</i> s 23, 39                | <i>CcWRKY</i> s 13, 34                     | <i>CcWRKY</i> s 10, 29     | <i>CcWRKY</i> s 7, 12      |                       |                  |                  |                            |                  |
| <b>BPSO</b> | <i>CcWRKY</i> s 21, 22, 30, 31, 32, 33, 34, 35, 36, 37, 38, 39, 40, 41, 42, 43 | <i>CcWRKY</i> s 5, 12, 15, 20, 23, 24, 26, 27, 28, 29                       | <i>CcWRKY</i> s 1, 3, 4, 10, 13, 25                    | <i>CcWRKY</i> s 7, 11                 |                                            |                            | <i>CcWRKY</i> 14           |                       |                  |                  |                            |                  |



**Table S7: Primer details of CcWRKYs used in this study**

| Gene Accession no. | S.No.           |   | Sequence                 | length | Product Size (bp) |
|--------------------|-----------------|---|--------------------------|--------|-------------------|
| C.cajan_24537      | <i>CcWRKY1</i>  | F | CTCTTTCTTCCTCTTCGTTG     | 20     | 130               |
|                    |                 | R | CTCACCCTCTCTTCAACCT      | 20     |                   |
| C.cajan_29457      | <i>CcWRKY3</i>  | F | GAGATGAAGAAGAGGGTGGT     | 20     | 169               |
|                    |                 | R | CCTTTGAACTGCTGCATC       | 18     |                   |
| C.cajan_13648      | <i>CcWRKY4</i>  | F | ATGGACAGAAACCGATAAAG     | 20     | 108               |
|                    |                 | R | GATCTAAGTGGCTCCTTCA      | 20     |                   |
| C.cajan_20775      | <i>CcWRKY5</i>  | F | ACTACCACCTCCTCTCTTT      | 20     | 156               |
|                    |                 | R | AGAAGAGGTTTGGGAAGGAGT    | 20     |                   |
| C.cajan_13299      | <i>CcWRKY7</i>  | F | ATTATCCGTCCAACAAGTC      | 20     | 198               |
|                    |                 | R | CTTCTGGGATATTTTGCCT      | 20     |                   |
| C.cajan_00060      | <i>CcWRKY10</i> | F | GAAGGTGCAAAGAAGTGTGGA    | 21     | 178               |
|                    |                 | R | AGTAGCCATCTGTTCCACCA     | 20     |                   |
| C.cajan_26275      | <i>CcWRKY11</i> | F | AGCACAATCATCCCCACCCTTCT  | 23     | 158               |
|                    |                 | R | AGACTCGCTTTTGGTGCTTGACT  | 23     |                   |
| C.cajan_08231      | <i>CcWRKY12</i> | F | CAACCATCCTCTTCCAGT       | 18     | 161               |
|                    |                 | R | GACTGAAACTCGGACCAT       | 18     |                   |
| C.cajan_41159      | <i>CcWRKY13</i> | F | ACCAACGTCCAAGAGCAAACCA   | 22     | 151               |
|                    |                 | R | TGATGGGATTCTTGGGGTTGAAGC | 24     |                   |
| C.cajan_03812      | <i>CcWRKY14</i> | F | AACCACAACCACCCTCTT       | 18     | 196               |
|                    |                 | R | TAGTGGGAAATGGTGCAG       | 18     |                   |
| C.cajan_10680      | <i>CcWRKY15</i> | F | CGTCTCAATCATCACACC       | 18     | 159               |
|                    |                 | R | GTCCAGCACAGTTCTCAA       | 18     |                   |
| C.cajan_29944      | <i>CcWRKY20</i> | F | GTAATTCAGTTCCGAGGTCT     | 20     | 140               |
|                    |                 | R | ACTACGAGGATTTTCACTCC     | 20     |                   |
| C.cajan_36768      | <i>CcWRKY21</i> | F | TCGAGGGGTTTCTAGCAGA      | 20     | 167               |
|                    |                 | R | ATAGTTCCTCGGATTGGGGC     | 20     |                   |

|               |                 |   |                         |    |     |
|---------------|-----------------|---|-------------------------|----|-----|
| C.cajan_41592 | <i>CcWRKY22</i> | F | CCACCACCAGATACACCT      | 18 | 186 |
|               |                 | R | GCTGCTACCTCCAAAGTC      | 18 |     |
| C.cajan_08305 | <i>CcWRKY23</i> | F | TGCAACCTCCACCATCAATAACA | 23 | 174 |
|               |                 | R | CTTGGGTTGGGGCTGTTCTT    | 20 |     |
| C.cajan_40644 | <i>CcWRKY24</i> | F | TCACAAAGCACCACCGAGTC    | 20 | 192 |
|               |                 | R | CTTGCCATACTTCCTCCACTTGT | 23 |     |
| C.cajan_43923 | <i>CcWRKY25</i> | F | CAGTGGTAGTGTTAGTGGTAGCA | 23 | 164 |
|               |                 | R | GGCCATACTTCCTCCATCGATAA | 23 |     |
| C.cajan_26666 | <i>CcWRKY26</i> | F | AGTGAAACCCTTGCGACCCT    | 20 | 181 |
|               |                 | R | GCTCCTTCTGCTTCTTCTCCT   | 23 |     |
| C.cajan_02335 | <i>CcWRKY27</i> | F | ACTGATCCAAGCGTTGTGGTGA  | 22 | 164 |
|               |                 | R | TGATGGTTGTGGTGTGGTGT    | 21 |     |
| C.cajan_28176 | <i>CcWRKY28</i> | F | CAGTTATGGGTCGCTCGGGAG   | 21 | 184 |
|               |                 | R | CCTGGACTGTAGCAAAGCGGT   | 21 |     |
| C.cajan_16563 | <i>CcWRKY29</i> | F | CTTCCACCACCATGCTCCGT    | 20 | 184 |
|               |                 | R | ACCACCCTCTTCCTCTGCCT    | 20 |     |
| C.cajan_25148 | <i>CcWRKY30</i> | F | CCTCAAAGCATCGCCGCCA     | 19 | 179 |
|               |                 | R | GTTGCTTTGTTGACGGCGGC    | 20 |     |
| C.cajan_25149 | <i>CcWRKY31</i> | F | GCTTCCCTTTCTCCCCTGCTTT  | 22 | 167 |
|               |                 | R | TGGTGGTGCTGATGTGGTGAC   | 21 |     |
| C.cajan_04816 | <i>CcWRKY32</i> | F | GCGTCTCCTCCAACCTCCTC    | 19 | 150 |
|               |                 | R | GGCACCCTTCTTGAACG       | 18 |     |
| C.cajan_41239 | <i>CcWRKY33</i> | F | CTCTCGGCCTCCAACAAGTG    | 20 | 200 |
|               |                 | R | GGACACCCTCTCACCGTACT    | 20 |     |
| C.cajan_05144 | <i>CcWRKY34</i> | F | CCTCCTCCTGTTCCCTGCTCC   | 20 | 159 |
|               |                 | R | CGCACCTTCCCCTTCCTTA     | 20 |     |
| C.cajan_05149 | <i>CcWRKY35</i> | F | ACTGTCTTCAAAGGGTGGGG    | 20 | 150 |
|               |                 | R | GTAACCTCCCCTCCGTCCAAG   | 20 |     |
| C.cajan_04448 | <i>CcWRKY36</i> | F | GCAACAGCAACGCATGGAAC    | 20 | 173 |
|               |                 | R | TGGGAGGTGTGCTTGATCGA    | 20 |     |
| C.cajan_16799 | <i>CcWRKY37</i> | F | GGTGTGGTGGAGGGAAGGT     | 20 | 158 |
|               |                 | R | ACGCCATCTCTTGTTCACCT    | 21 |     |
| C.cajan_2733  | <i>CcWRKY38</i> | F | CCCAAGGCATCCAAACCAGC    | 20 | 183 |
|               |                 | R | ACCTGCTGAGAGTGGCCAC     | 19 |     |

|                |                  |   |                        |    |     |
|----------------|------------------|---|------------------------|----|-----|
| C.cajan_35299  | <i>CcWRKY39</i>  | F | TTCCAAATCCCCTTCCCCGG   | 20 | 187 |
|                |                  | R | TGTCTGCAAGGTGTGGTGGT   | 20 |     |
| C.cajan_17992  | <i>CcWRKY40</i>  | F | GGCCAGAAACAGGTGAAGGG   | 20 | 181 |
|                |                  | R | TGATGGTGTCTTTGGAGCGC   | 20 |     |
| C.cajan_04900  | <i>CcWRKY41</i>  | F | AACGTCCTCATCCCATGCCT   | 20 | 159 |
|                |                  | R | TGGCGTCAGTGTTCCTCTCT   | 21 |     |
| C.cajan_05822  | <i>CcWRKY42</i>  | F | CCTCGCTTTGCTTCTTGACT   | 21 | 154 |
|                |                  | R | CCACCCTTTTCTTCACACCACA | 22 |     |
| C.cajan_42797  | <i>CcWRKY43</i>  | F | GCGCGCACTCCATGTATG     | 18 | 172 |
|                |                  | R | TCCACCCGAACTCCCTGA     | 18 |     |
| XM_020367686.1 | Actin            | F | TGTTCCAGCCATCCATGA     | 18 | 180 |
|                |                  | R | CCAACGCGGTGATTTCTT     | 18 |     |
| XM_020353202.1 | $\beta$ -Tubulin | F | GCCCTGACAACCTTCGTCTTC  | 20 | 125 |
|                |                  | R | GCAGTTTTTCAGCCTCTTGC   | 20 |     |

**Table S8: Comparative expression profile of individual pigeonpea WRKY genes that are either highly or lowly up-regulated under individual stresses of *Fusarium udum* and NaCl**

| Highly up-regulated in <i>F. udum</i> (> 10 folds) but lowly up-regulated in NaCl (< 10 folds) | Highly up-regulated in NaCl (> 10 folds) but lowly up-regulated in <i>F. udum</i> (< 10 folds)                                                                                                                          | Highly up-regulated in both individual stresses of <i>F. udum</i> and NaCl (> 10 folds)                                                                                                       | Lowly up-regulated in both individual stresses of <i>F. udum</i> and NaCl (< 10 fold)                                                                                  |
|------------------------------------------------------------------------------------------------|-------------------------------------------------------------------------------------------------------------------------------------------------------------------------------------------------------------------------|-----------------------------------------------------------------------------------------------------------------------------------------------------------------------------------------------|------------------------------------------------------------------------------------------------------------------------------------------------------------------------|
| <p><i>CcWRKY 1</i></p> <p><i>CcWRKY 36</i></p>                                                 | <p><i>CcWRKY 10</i></p> <p><i>CcWRKY 21</i></p> <p><i>CcWRKY 23</i></p> <p><i>CcWRKY 28</i></p> <p><i>CcWRKY 29</i></p> <p><i>CcWRKY 31</i></p> <p><i>CcWRKY 34</i></p> <p><i>CcWRKY 37</i></p> <p><i>CcWRKY 38</i></p> | <p><i>CcWRKY 4</i></p> <p><i>CcWRKY 7</i></p> <p><i>CcWRKY 12</i></p> <p><i>CcWRKY 22</i></p> <p><i>CcWRKY 30</i></p> <p><i>CcWRKY 32</i></p> <p><i>CcWRKY 39</i></p> <p><i>CcWRKY 43</i></p> | <p><i>CcWRKY 5</i></p> <p><i>CcWRKY 14</i></p> <p><i>CcWRKY 24</i></p> <p><i>CcWRKY 25</i></p> <p><i>CcWRKY 27</i></p> <p><i>CcWRKY 33</i></p> <p><i>CcWRKY 42</i></p> |
